# Supplementary material for: A genome-wide CRISPR screen identifies WDFY3 as a regulator of macrophage efferocytosis
Source: PubMed Central journal article supplement (PMC9789999; doi:10.1038/s41467-022-35604-8), 2022-12-24
Supplement: 41467_2022_35604_MOESM1_ESM.pdf [file 41467_2022_35604_MOESM1_ESM.pdf]

# Supplementary Information

## A Genome-wide CRISPR Screen Identifies WDFY3 as a Regulator of Macrophage Efferocytosis

Jianting Shi, Xun Wu et al.

|                                                                  |    |
|------------------------------------------------------------------|----|
| <b>Supplementary Figures 1-11</b> .....                          | 2  |
| <b>Supplementary Tables 1-14</b> .....                           | 17 |
| 1. Cell Lines and Primary Cells .....                            | 17 |
| 2. Mice .....                                                    | 18 |
| 3. gRNAs for CRISPR Screen Validation .....                      | 19 |
| 4. Plasmids .....                                                | 20 |
| 5. Primers for Genotyping .....                                  | 21 |
| 6. Primers for Quantitative RT-PCR.....                          | 22 |
| 7. siRNAs .....                                                  | 23 |
| 8. Antibodies .....                                              | 24 |
| 9. Cell Culture Medium .....                                     | 25 |
| 10. Chemicals and Recombinant Cytokines .....                    | 26 |
| 11. Commercial Assay Kits .....                                  | 27 |
| 12. Reagents for Efferocytosis and Phagocytosis Assays .....     | 28 |
| 13. Other Reagents and Supplies .....                            | 29 |
| 14. Software and Algorithms .....                                | 30 |
| <b>Supplementary Notes 1-3</b> .....                             | 31 |
| 1. Quantification of binding assay.....                          | 31 |
| 2. Quantification of F-actin ring .....                          | 32 |
| 3. Quantification of non-fragmented ACs in BMDMs and HMDMs ..... | 33 |
| <b>Supplementary References</b> .....                            | 34 |

# Supplementary Figures and Figure Legends

## Supplementary Fig. 1

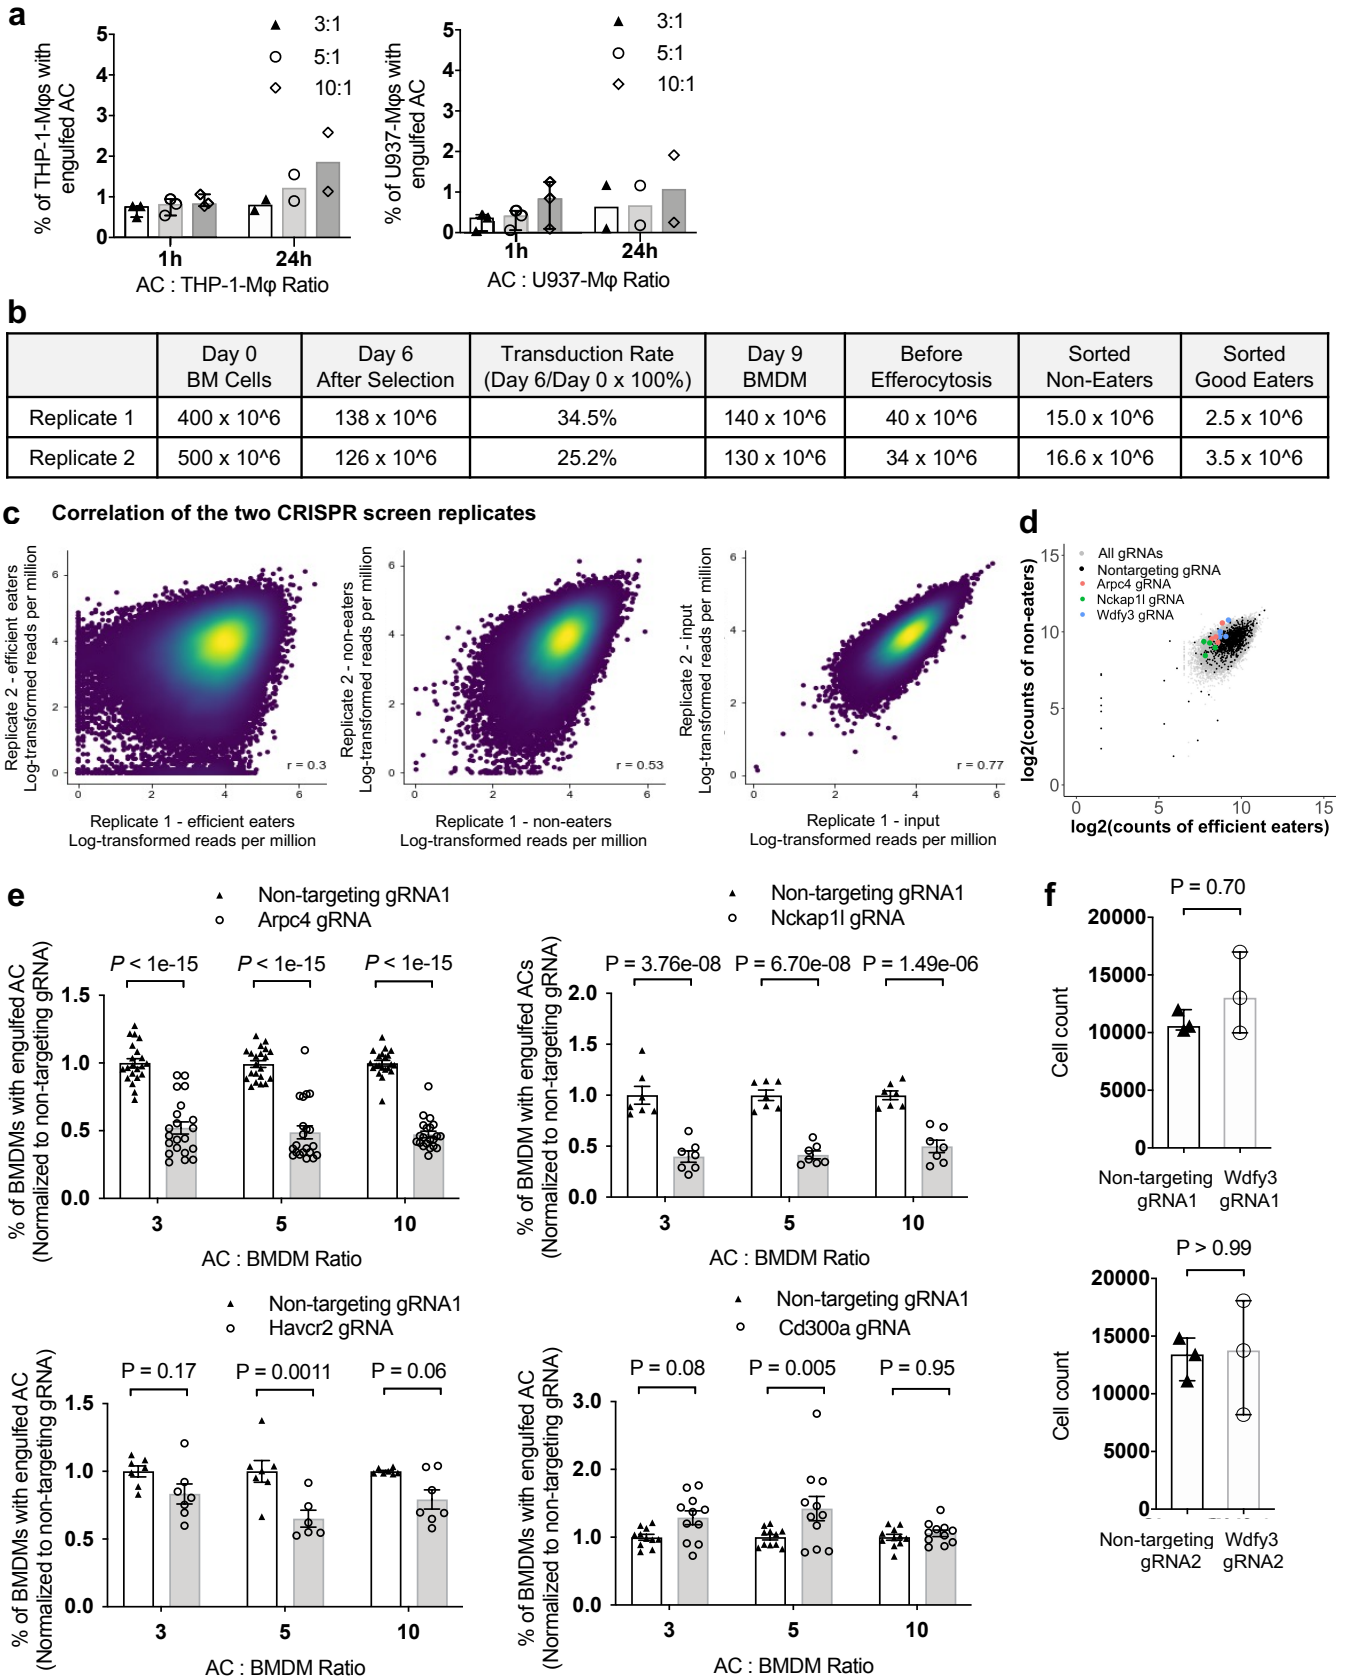

**Supplementary Fig. 1 Quality control of our genome-wide CRISPR screen and validation of selected top hits.**

**(a)** Efferocytosis of PKH26-labeled human Jurkat apoptotic cells by U937-derived macrophages and THP-1-derived macrophages (n = 2 or 3 independent experiments. The height of the bars represents median. The error bars represent 95% CI.) **(b)** The number of cells in each step for each of the two replicates of CRISPR screens. **(c)** Pearson's correlation coefficient for gRNA counts between the two replicates for "efficient eaters", "non-eaters", and the "input" samples. **(d)** Visualization of gRNA counts of all gRNAs, the non-targeting gRNAs, and the gRNAs targeting the top positive regulators. **(e)** High Content Imaging-based individual validation of top screen hits using gRNAs in the original screening library (n = 7 independent experiments for *Arpc4*, n = 3 independent experiments for *Cd300a*, n = 2 independent experiments for *Nckap1l* and *Havcr2*, each from the average of 3-5 technical replicates. Technical replicates were obtained from pooled cells from multiple biological replicates). **(f)** Knockout by gRNAs targeting *Wdfy3* did not affect BMDM viability (n = 3 independent experiments for each gRNA). Data are presented as mean  $\pm$  SEM in panel **e** or median  $\pm$  95% CI in panel **f**. Two-sided P values were determined by a two-way ANOVA with Tukey's multiple comparisons test in panel **e**, or by Mann-Whitney test in panel **f**. AC, apoptotic cell; M $\phi$ , macrophages.

# Supplementary Fig. 2

| Source: This study<br>Analysis Package: MAGeCK<br>Sorting method: FACS-based sorting |                                    | Haney et al., 2018<br>casTLE<br>Magnetic beads-based sorting               |                               |                                     |                                       |                                       |                                       |                 |                 |               |           | Kamber et al., 2021<br>casTLE<br>FACS-based sorting<br>Customized genome-wide<br>CRISPR/Cas9 deletion<br>library (Morgens et al.,<br>2017) |  |
|--------------------------------------------------------------------------------------|------------------------------------|----------------------------------------------------------------------------|-------------------------------|-------------------------------------|---------------------------------------|---------------------------------------|---------------------------------------|-----------------|-----------------|---------------|-----------|--------------------------------------------------------------------------------------------------------------------------------------------|--|
| Screen library: Brie Library                                                         |                                    | Customized genome-wide CRISPR/Cas9 deletion library (Morgens et al., 2017) |                               |                                     |                                       |                                       |                                       |                 |                 |               |           | J774 macrophages                                                                                                                           |  |
| Phagocyte: BMDMs                                                                     |                                    | U937-derived macrophages                                                   |                               |                                     |                                       |                                       |                                       |                 |                 |               |           | APMAP <sup>pos</sup> Ramos cells<br>(~10 µm)                                                                                               |  |
| Substrates:                                                                          | Apoptotic Jurkat cells<br>(~10 µm) | IgG-opsonized RBCs<br>(~4 µm)                                              | C3b-opsonized RBCs<br>(~4 µm) | Beads (4 µm, negatively<br>charged) | Beads (1.3 µm,<br>negatively charged) | Beads (0.3 µm,<br>negatively charged) | Beads (1.3 µm,<br>positively charged) | Zymosan (~1 µm) | Myelin (500 nm) |               |           |                                                                                                                                            |  |
| Rank                                                                                 |                                    |                                                                            |                               |                                     |                                       |                                       |                                       |                 |                 |               | Frequency |                                                                                                                                            |  |
| 1                                                                                    | UZAF1                              | PRKCD                                                                      | NCKAP1L                       | NHLRC2                              | NHLRC2                                | NHLRC2                                | NHLRC2                                | MAPK1           | MAPK1           | FERMT3        |           |                                                                                                                                            |  |
| 2                                                                                    | ARPC4                              | NCKAP1L                                                                    | PRKCD                         | TM2D2                               | TM2D2                                 | TM2D2                                 | ACTR2                                 | PRKCD           | ITGB2           | ITGB2         |           |                                                                                                                                            |  |
| 3                                                                                    | DYRK1A                             | PRKCB                                                                      | MAPK1                         | LCMT1                               | ABI1                                  | TM2D3                                 | NCKAP1L                               | NHLRC2          | NHLRC2          | TLN1          |           |                                                                                                                                            |  |
| 4                                                                                    | WDR52                              | ABI1                                                                       | ABI1                          | SY51-DBNDD2                         | DOCK2                                 | NCKAP1L                               | ACTR3                                 | TLN1            | TLN1            | NCKAP1L       |           |                                                                                                                                            |  |
| 5                                                                                    | POMT2                              | MAPK1                                                                      | DOCK2                         | TLE3                                | CD93                                  | ARPC4-TTL3                            | ABI1                                  | PRKCD           | PRKCD           | HSP90B1       |           |                                                                                                                                            |  |
| 6                                                                                    | PREX2                              | PRKCD                                                                      | BRK1                          | TM2D3                               | CYFIP1                                | LCMT1                                 | DOCK2                                 | PRKCD           | PRKCB           | WASF2         |           |                                                                                                                                            |  |
| 7                                                                                    | HAVCR2                             | DOCK2                                                                      | CREBBP                        | ABI1                                | LCMT1                                 | TM2D1                                 | CYFIP1                                | ITGB2           | PRKCD           | OTUD5         |           |                                                                                                                                            |  |
| 8                                                                                    | BCL2L13                            | AP002348.1                                                                 | FBXO11                        | PTPN7                               | ACTR2                                 | PPME1                                 | ARPC2                                 | FERMT3          | SHOC2           | BRK1          |           |                                                                                                                                            |  |
| 9                                                                                    | TRAF3                              | IKBIP                                                                      | PRKCB                         | RPS6KA1                             | BRK1                                  | RPS6KA1                               | ARPC4-TTL3                            | PRKCB           | FERMT3          | GPR84         |           |                                                                                                                                            |  |
| 10                                                                                   | WDFY3                              | CHC1                                                                       | CYFIP1                        | STUB1                               | STUB1                                 | CHIC2                                 | ARPC4                                 | CERS2           | SUCNR1          | ITGAM         |           |                                                                                                                                            |  |
| 11                                                                                   | VP552                              | SGMS1                                                                      | SHOC2                         | NCKAP1L                             | ARPC2                                 | KAT6A                                 | SPPL3                                 | NCKAP1L         | PLEK            | CNOT2         |           |                                                                                                                                            |  |
| 12                                                                                   | SEC81A1                            | MTDH                                                                       | NPR2                          | KAT6A                               | RP11-45M22.4                          | HSD17B12                              | LCMT1                                 | SHOC2           | RP11-45M22.4    | ARPC4         |           |                                                                                                                                            |  |
| 13                                                                                   | KPNA6                              | MOBP                                                                       | JUNB                          | CTUB1                               | TM2D2                                 | DDA1                                  | RAC1                                  | SUCNR1          | NCKAP1L         | MESDC2        |           |                                                                                                                                            |  |
| 14                                                                                   | NCKAP1L                            | BRK1                                                                       | AHSA1                         | TBL1XR1                             | PPME1                                 | ABI1                                  | ARPC3                                 | ABI1            | ARAF            | RAB5C         |           |                                                                                                                                            |  |
| 15                                                                                   | FCRL1                              | FBXW12                                                                     | PIK3R5                        | PPME1                               | WASF2                                 | CYFIP1                                | MAPK1                                 | JUNB            | MEF2D           | ARPC1B        |           |                                                                                                                                            |  |
| 16                                                                                   | VARS1                              | ZNF286B                                                                    | AMBRA1                        | ARFRP1                              | LAMTOR4                               | HSPA14                                | AMBRA1                                | FADD            | ABI1            | UBR5          |           |                                                                                                                                            |  |
| 17                                                                                   | CEBPB                              | TMEM256-PLSCR3                                                             | DEPDC5                        | SYS1                                | ARPC3                                 | STUB1                                 | MYO9B                                 | ELOVL1          | JUNB            | COMMD2        |           |                                                                                                                                            |  |
| 18                                                                                   | TMEM200A                           | CREBBP                                                                     | SGMS1                         | UBE2D3                              | ACTR3                                 | CUL3                                  | RPL21                                 | RIT1            | ARPC4-TTL3      | MEMO1         |           |                                                                                                                                            |  |
| 19                                                                                   | ACTR3                              | NPR2                                                                       | ELOVL1                        | JMJ36                               | ARF1                                  | UBE2D3                                | AIP                                   | RP11-45M22.4    | MESDC2          | ACTR2         |           |                                                                                                                                            |  |
| 20                                                                                   | SLC2A12                            | FI51                                                                       | TLN1                          | XPR1                                | PPP2R1A                               | CD93                                  | FADD                                  | C16ORF72        | IDEK            |               |           |                                                                                                                                            |  |
| 21                                                                                   | TSC22D2                            | PACX                                                                       | RAC1                          | ELAVL3                              | CHIC3                                 | TM2D3                                 | AFF2                                  | JAK1            | BRAP            | MAPK14        |           |                                                                                                                                            |  |
| 22                                                                                   | ABHD17A                            | ARPC4                                                                      | NPR3                          | USE1                                | ARPC4-TTL3                            | ACTR3                                 | WASF2                                 | GAB1            | ARFC3           | ABI1          |           |                                                                                                                                            |  |
| 23                                                                                   | RAC1                               | NARG2                                                                      | PRKCD                         | C1ORF43                             | LAMTOR2                               | IQCA1                                 | RRAGA                                 | ACTR3           | RIT1            | RABGGTA       |           |                                                                                                                                            |  |
| 24                                                                                   | PREX1                              | FAM27D1                                                                    | SUCNR1                        | CYFIP1                              | WDR81                                 | TLE3                                  | KL6F                                  | FBXO11          | HSP90B1         | EED           |           |                                                                                                                                            |  |
| 25                                                                                   | SH3GLB1                            | JUN                                                                        | SRM                           | MTA2                                | SASH3                                 | BRD9                                  | TM2D1                                 | KRAS            | ARHGAP30        |               |           |                                                                                                                                            |  |
| 26                                                                                   | SNX24                              | AC022498.1                                                                 | E2F8                          | GAPDH                               | FNIP2                                 | GFMI1                                 | BIN2                                  | TRAPPC2L        | JAK1            | TMEM189       |           |                                                                                                                                            |  |
| 27                                                                                   | CODC115                            | TM2D1                                                                      | MORF4L2                       | WAS                                 | TM2D1                                 | MLL1                                  | BRK1                                  | ACTR5           | AHSA1           | FRYL          |           |                                                                                                                                            |  |
| 28                                                                                   | SEID1B                             | LENEP                                                                      | CERS2                         | DOT1L                               | ACTB                                  | SLC25A51                              | LAMTOR4                               | ARN1            | CERS2           | SMARCB1       |           |                                                                                                                                            |  |
| 29                                                                                   | ABCC1                              | YOD1                                                                       | CHIC3                         | RAC1                                | SAP130                                | TMEM167A                              | RP11-45M22.4                          | JAK1            | ELOVL1          | UBAP2L        |           |                                                                                                                                            |  |
| 30                                                                                   | CYFIP1                             | ERP44                                                                      | EZH1                          | MCN3                                | MYO9B                                 | OAND1                                 | TM2D2                                 | CSF2RB          | CS3H1           | ITPA2A        |           |                                                                                                                                            |  |
| 31                                                                                   | PIAS1                              | CYFIP1                                                                     | ERP44                         | PCNX                                | RAC1                                  | UBE2L3                                | BRD2                                  | ARPC2           | RAF1            | 9130011515RIK |           |                                                                                                                                            |  |
| 32                                                                                   | DCLRE1A                            | ZNF22                                                                      | ARPC4-TTL3                    | TM2D1                               | PPP6R1                                | RPEL28                                | XPR1                                  | ERP44           | GNAI2           | CITED2        |           |                                                                                                                                            |  |
| 33                                                                                   | GIMAP4                             | BASP1                                                                      | PLEK                          | C11ORF73                            | ARPC4                                 | C11ORF73                              | PTDS51                                | ACTR2           | RRAGA           | GMC20431      |           |                                                                                                                                            |  |
| 34                                                                                   | CEBPA                              | YPEL5                                                                      | SASH3                         | PTPRC                               | TMEM208                               | RFC3                                  | LAMTOR2                               | CREBBP          | ACTR2           | BHLHE41       |           |                                                                                                                                            |  |
| 35                                                                                   | RTL8A                              | LOR                                                                        | RPS6KA3                       | ANAPC2                              | SPTLC1                                | ARPC2                                 | PIK3R5                                | AMBRA1          | GAB1            | ITGB1         |           |                                                                                                                                            |  |
| 36                                                                                   | PRAMEF6                            | MAP3K4                                                                     | DIRK1A                        | CD93                                | LAMTOR3                               | CCM2                                  | OTUD5                                 | AHR             | ACTR3           | KDM6A         |           |                                                                                                                                            |  |
| 37                                                                                   | TAS2R16                            | YOD1                                                                       | CHIC3                         | FURIN                               | SAP130                                | NSMCE1                                | C1GALT1C1                             | KRAS            | ARPC4           | NCSTN         |           |                                                                                                                                            |  |
| 38                                                                                   | ATP1B3                             | ECHDC9                                                                     | SAMD7                         | MYO9B                               | ARF6                                  | ZMYND8                                | UBE2D3                                | TRBV27          | GREBBP          | FBXO11        |           |                                                                                                                                            |  |
| 39                                                                                   | STRSIA2                            | RBM4B                                                                      | ARAF                          | LDLR                                | MYO9B                                 | ARPC3                                 | HRC                                   | LRRC8A          | AMBRA1          | NRAS          |           |                                                                                                                                            |  |
| 40                                                                                   | COMMD4                             | RAX2                                                                       | WASF2                         | BCL11A                              | PCNX                                  | NPEPPS                                | USP34                                 | SPPL3           | RPS6KA3         | SOS1          |           |                                                                                                                                            |  |
| 41                                                                                   | SPTY2D1                            | ELOVL1                                                                     | YPEL5                         | KCTD5                               | TIMMDC1                               | LBX1                                  | GNAI2                                 | PPP1CC          | CCM2            |               |           |                                                                                                                                            |  |
| 42                                                                                   | WASF2                              | TRIM41                                                                     | WDR3                          | PPP6R1                              | NARS2                                 | WDR36                                 | BASP1                                 | CYFIP1          | RRAGC           | METTL16       |           |                                                                                                                                            |  |
| 43                                                                                   | ABI1                               | AHSA1                                                                      | STT3B                         | LZTR1                               | SPTSSA                                | LZTR1                                 | WDR81                                 | RRAGA           | CSK             | UCHL5         |           |                                                                                                                                            |  |
| 44                                                                                   | TREM2                              | ELOVL5                                                                     | SETD1B                        | GFH1                                | BASP1                                 | CD42                                  | ATAD2                                 | ARPC3           | MAP2K3          | ST3GAL3       |           |                                                                                                                                            |  |
| 45                                                                                   | SHL1D1                             | TRNP1                                                                      | KDM1B                         | CEBPE                               | HOXD13                                | KAT7                                  | SF3B1                                 | KRAS            | ACTB            | ZMYM4         |           |                                                                                                                                            |  |
| 46                                                                                   | GTFC31                             | GADD45B                                                                    | LRRC8A                        | TBC1D10B                            | ARF6                                  | ZCCHC7                                | C1GALT1C1                             | TRBV27          | GREBBP          | FBXO11        |           |                                                                                                                                            |  |
| 47                                                                                   | TLE4                               | GSTT2B                                                                     | MDN1                          | VPS54                               | CAPN9                                 | C15ORF53                              | PACS2                                 | RPS6KA3         | NIFK            | SLC25A26      |           |                                                                                                                                            |  |
| 48                                                                                   | ISY1                               | MEP1A                                                                      | SNRNP25                       | NF1                                 | COX20                                 | PCNX                                  | HECTD1                                | SLC35B4         | BRAP            | RAB1          |           |                                                                                                                                            |  |
| 49                                                                                   | OR10K1                             | AL591684.1                                                                 | HNRNPF                        | TMEM203                             | NGLY1                                 | PPP2R2A                               | PDCL                                  | DAZAP1          | ACTR5           | UGP2          |           |                                                                                                                                            |  |
| 50                                                                                   | CDK9                               | MRP2                                                                       | SPRED2                        | SND1                                | SPRED2                                | UBE2A                                 | BCL6                                  | C19ORF25        | LAMTOR2         | ARPC2         |           |                                                                                                                                            |  |
| 51                                                                                   | MGAT1                              | CDKL1                                                                      | RAF1                          | RAB10                               | MESDC2                                | PTPN7                                 | MRPL18                                | QKI             | RAB7A           | YTHDF3        |           |                                                                                                                                            |  |
| 52                                                                                   | VPS33A                             | FKBP5                                                                      | THRAP3                        | KIAA1109                            | UBE2D3                                | CAB39                                 | TOR1B                                 | TRAF6           | OSTC            | PSMA1         |           |                                                                                                                                            |  |
| 53                                                                                   | ACTR2                              | TRIM48                                                                     | ARL4A                         | SLC38A2                             | CCER1                                 | ANLN                                  | C5ORF47                               | C16ORF72        | DOCK2           | KRAS          |           |                                                                                                                                            |  |
| 54                                                                                   | ACTB                               | FEZF2                                                                      | PRKRA                         | PAXBP1                              | CHMP5                                 | STK11                                 | CDK11A                                | MEF2D           | CYFIP1          | NWHAE         |           |                                                                                                                                            |  |
| 55                                                                                   | FBXW12                             | FBXO11                                                                     | KL1F6                         | RPL28                               | C1GALT1C1                             | ARF4                                  | TMEM30A                               | GNAI2           | ZNF699          | CYFIP1        |           |                                                                                                                                            |  |
| 56                                                                                   | ELOVL5                             | RAC1                                                                       | ITFG2                         | ABT1                                | NFE2L2                                | TBCB                                  | VPS4B                                 | IRF8            | ELF1            | MLL1          |           |                                                                                                                                            |  |
| 57                                                                                   | HNRNPK                             | ZNF699                                                                     | ATAD1                         | PRELID1                             | LSDM1                                 | AKT2                                  | C1ORF220                              | APEH            | BRK1            | INTS10        |           |                                                                                                                                            |  |
| 58                                                                                   | SF3B2                              | SARNP                                                                      | CTSE                          | NAPG                                | MAFA                                  | UBE2K                                 | EWSR1                                 | MAP2K3          | ARPC2           | RUNX1         |           |                                                                                                                                            |  |
| 59                                                                                   | NFKBIA                             | FJX1                                                                       | PAPD5                         | PRPH2                               | AC021860.1                            | RSRC2                                 | SFTPA1                                | LARP4           | YPEL5           | SPOP          |           |                                                                                                                                            |  |
| 60                                                                                   | FBXW2                              | TMM13                                                                      | BIN2                          | SBDS                                | MAB21L3                               | AAGAB                                 | ACAD8                                 | AIP             | SPOC2           | ZKSCAN5       |           |                                                                                                                                            |  |
| 61                                                                                   | DENND3                             | RNF187                                                                     | EH3D                          | AFP2                                | KIAA1432                              | TNFAIP3                               | TRAPPC2L                              | STIP1           | MAGT1           | SH3BP2        |           |                                                                                                                                            |  |
| 62                                                                                   | TMEM220                            | CKAP4                                                                      | CARM1                         | BRK1                                | GPR2                                  | ANAPC10                               | ARPC4-TTL3                            | MEF2D           | KSR1            | INWAS         |           |                                                                                                                                            |  |
| 63                                                                                   | CCDC9B                             | RADS1AP1                                                                   | FERMT3                        | MYO2                                | MYBP2                                 | KCTD5                                 | ZFAND4                                | CSK             | BCL6            | ELAVL1        |           |                                                                                                                                            |  |
| 64                                                                                   | ALPK1                              | ALKBH2                                                                     | OR1S1                         | NUDCD2                              | TRD3                                  | MTA2                                  | DNAJB4                                | UBL5            | REC8            | WIPF1         |           |                                                                                                                                            |  |
| 65                                                                                   | UROD                               | AKAP2                                                                      | C12ORF66                      | COQ10B                              | RPL28                                 | GDF1                                  | ARPC5                                 | JAK2            | MAP2K1          | FXR1          |           |                                                                                                                                            |  |
| 66                                                                                   | ZBTB46                             | AL592284.1                                                                 | ZBTB1                         | NCOR1                               | FAM90A1                               | W12-3308P17.2                         | RP11-146D12.2                         | GPR89C          | ALK             | BC051142      |           |                                                                                                                                            |  |
| 67                                                                                   | ODAD2                              | PKN3                                                                       | PHF6                          | SRRD                                | USF1                                  | CBWD7                                 | CSTF3                                 | CSF2RA          | STT3B           | PTPRO         |           |                                                                                                                                            |  |
| 68                                                                                   | SOC55                              | RARRS2                                                                     | LBX1                          | NSMCE2                              | TMEM60                                | HIST2H2AA4                            | CASP9                                 | PIK3R5          | SAMSN1          | LRRC25        |           |                                                                                                                                            |  |
| 69                                                                                   | PDCD1                              | AC020922.1                                                                 | STEAP3                        | TUSC1                               | PIK3R5                                | VPS11                                 | WSB1                                  | FLCN            | GABARAPL2       | OLFR1167      |           |                                                                                                                                            |  |
| 70                                                                                   | TAS1R1                             | ABHD14B                                                                    | GRPEL1                        | CCNH                                | HIST1H2BJ                             | RPRD2                                 | SASH3                                 | RREB1           | FOXJ3           | PNRC1         |           |                                                                                                                                            |  |
| 71                                                                                   | FZ1                                | AK2                                                                        | FRG2C                         | GNF                                 | SERP1                                 | TFEB                                  | PDHA1                                 | UTP15           | RAX             | DSTYK         |           |                                                                                                                                            |  |
| 72                                                                                   | GRIN2D                             | TP53                                                                       | NXF5                          | TNPO1                               | AMBRA1                                | C1ORF43                               | KDM2A                                 | BCL6            | CEL2F           | CLASRP        |           |                                                                                                                                            |  |
| 73                                                                                   | TOPAZ1                             | C2ORF27B                                                                   | KPTN                          | NIP7                                | SNRK                                  | RAB1A                                 | AKT1                                  | KDM1B           | CTTNBP2         | CFP           |           |                                                                                                                                            |  |
| 74                                                                                   | ARPC3                              | RP11-204N11.1                                                              | RC3H1                         | JKAMP                               | HIST1H2AH                             | WDR7                                  | FMO5                                  | MS4A8           | MSH1            | XP06          |           |                                                                                                                                            |  |
| 75                                                                                   | MTMR9                              | SULT1C2                                                                    | SKA1                          | WASF2                               | NDUFA4                                | TMEM203                               | GOLGA8S                               | LAMTOR3         | GSK3B           | FLCN          |           |                                                                                                                                            |  |
| 76                                                                                   | TMEM98                             | NKD2                                                                       | MAF1                          | ZMYND8                              | ELMO2                                 | MYO9B                                 | CERS2                                 | FNIP2           | ORD3            | SURF2         |           |                                                                                                                                            |  |
| 77                                                                                   | FBXO11                             | PYURF                                                                      | KATNA1                        | LIMS3L                              | SERBP1                                | KLK14                                 | ACTR2                                 | DEPDC5          | NDUFA4L2        | SUZ12         |           |                                                                                                                                            |  |
| 78                                                                                   | CCDC88B                            | LCE1F                                                                      | SPAM1                         | TVP23C-CDRT4                        | TFEB                                  | AC09060.1                             | EHD1                                  | DEPDC5          | FAM63A          | WDR26         |           |                                                                                                                                            |  |
| 79                                                                                   | WNK1                               | CYS1                                                                       | PTPLB                         | MIDN                                | C21ORF128                             | ZFR                                   | PPP2R2A                               | RAB7A           | ICSF9           | ITAD2B        |           |                                                                                                                                            |  |
| 80                                                                                   | CEACAM4                            | HSPB1L1                                                                    | ITIH1                         | GTPBP3                              | TCERG1                                | ZC3HC1                                | PROCA1                                | AHSA1           | FBXO11          | RAB14         |           |                                                                                                                                            |  |
| 81                                                                                   | SERPIN3                            | TMEM11                                                                     | ELF4                          | ZC3HC1                              | FERMT2                                | ZFX                                   | PKN1                                  | API5            | SETD1B          | CRAMP1L       |           |                                                                                                                                            |  |
| 82                                                                                   | OPA3                               | CDKN2C                                                                     | ERG                           | FTO                                 | CCNF                                  | PA2G4                                 | APBB3                                 | AC025278.1      | WTAP            | PIK3CB        |           |                                                                                                                                            |  |
| 83                                                                                   | CTR9                               | DUS3L                                                                      | ARGLU1                        | PDHA1                               | STT3A                                 | MYC                                   | PITRM1                                | BIN2            | FGL1            | MAFB          |           |                                                                                                                                            |  |
| 84                                                                                   | PRL                                | ZNF503                                                                     | SFPQ                          | KIF11                               | TLN1                                  | COX8A                                 | ELOVL1                                | RP11-512M8.5    | WASF2           | ZBTB7A        |           |                                                                                                                                            |  |
| 85                                                                                   | UZAF2                              | AL645730.2                                                                 | USP46                         | SAP130                              | ARFRP1                                | ELAVL1                                | BRAP                                  | CBLC            | LAMTOR4         | ZFP644        |           |                                                                                                                                            |  |
| 86                                                                                   | METTL16                            | GORASP1                                                                    | RNF133                        | EWSR1                               | HSP90B1                               | CSNK2A2                               | KIAA1109                              | SD              | PHACTR4         | PIK3R1        |           |                                                                                                                                            |  |
| 87                                                                                   | POT1                               | PK3R6                                                                      | TRIM48                        | RAX                                 | BRD7                                  | PET112                                | USP17L2                               | RRAGC           | SPPL3           | DNTTIP1       |           |                                                                                                                                            |  |
| 88                                                                                   | APOL4                              | KCTD13                                                                     | NHLRC2                        | XPO6                                | NOC2L                                 | PEPD                                  | CSTF2                                 | FAM203A         | CTNND2          | ADR8K1        |           |                                                                                                                                            |  |
| 89                                                                                   | APOL1                              | GJA3                                                                       | TECPR2                        | AC019206.1                          | LLPH                                  | XPR1                                  | PPIAL4D                               | LAMTOR3         | PTPLB           | CSE1L         |           |                                                                                                                                            |  |
| 90                                                                                   | APOL3                              | C5ORF20                                                                    | BRD2                          | REG1A                               | WAS                                   | LAMTOR2                               | SEC23B                                | GNB1            | ZSWIM8          | GNB2          |           |                                                                                                                                            |  |
| 91                                                                                   | APOL2                              | CYBB                                                                       | DNAH5                         | FBXW12                              | NUDCD2                                | STAM                                  | TRAF2                                 | ICMT            | TRAF2           | PREX1         |           |                                                                                                                                            |  |
| 92                                                                                   | KATNB1                             | MRPS18A                                                                    | BRAP                          | RP11-763F8.1                        | TPRKB                                 | RASA2                                 | XRC6BP1                               | STT3B           | FNIP2           | STRIP1        |           |                                                                                                                                            |  |
| 93                                                                                   | TD02                               | NAA15                                                                      | EIF5B                         | ELAVL1                              | DAXX                                  | NUDCD2                                | SRRT                                  | BIN2            | FOXJ3           | SNX17         |           |                                                                                                                                            |  |
| 94                                                                                   | RHO                                | AL359091.2                                                                 | MAPK14                        | KIAA1432                            | APRT                                  | CCNF                                  | KIDINS220                             | GADD45B         | CNO11           | RELA          |           |                                                                                                                                            |  |
| 95                                                                                   | THAP3                              | RAB13                                                                      | CCDC8                         | NEDD8                               | WAPAL                                 | DOXA                                  | DDX28                                 | TRAF3IP3        | PLA2G4E         | MAP4K4        |           |                                                                                                                                            |  |
| 96                                                                                   | NPY4R                              | AC112721.1                                                                 | MUL1                          | WDR81                               | AUP1                                  | CDCT3                                 | PGAM1                                 | RC8A            | CDCA2           | DPH2          |           |                                                                                                                                            |  |
| 97                                                                                   | NPY4R2                             | JUNB                                                                       | TCEANC                        | AMBRA1                              | DHTKD1                                | ZGLP1                                 | MTHFD1                                | ELOVL5          | ADM1            | MATK          |           |                                                                                                                                            |  |
| 98                                                                                   | LYG2                               | HIST1H1E                                                                   | SZT2                          | SNRK                                | HSA-MIR-150                           | ACKR4                                 | CDC42                                 | SFPQ            | ORDB1           | TMEM237       |           |                                                                                                                                            |  |
| 99                                                                                   | ATP6V0B                            | SUN1                                                                       | CHMP3                         | UNC50                               | FLCN                                  | COX6B1                                | CREBBP                                | ELF4            | RASGRP3         | ARPC3         |           |                                                                                                                                            |  |
| 100                                                                                  | RPS23                              | RNF38                                                                      | MESDC2                        | CHMP6                               | HSAU7                                 | HNRNPA2B1                             | RPSA                                  | MYD88           | SASH3           | OLFR389       |           |                                                                                                                                            |  |

**Supplementary Fig. 2 Comparing the top-ranked positive regulators by our screen and previous screens in U937 monocytic cell line-derived macrophages or J774 macrophages using an array of substrates.**

The heatmap visualizes the overlap of the top-ranked positive regulators in our screen of efferocytosis in primary macrophages and in previously published screens of phagocytosis of an array of substrates in U937-derived macrophages (Haney et al, 2018<sup>1</sup>) or J774 macrophages (Kamber et al, 2021<sup>2</sup>). The matrix for generating the heatmap is in **Supplementary Data 6**. Murine gene symbols were converted to human gene symbols using gProfiler at <https://biit.cs.ut.ee/gprofiler/orth>.



**C**Monaco dataset<sup>1</sup>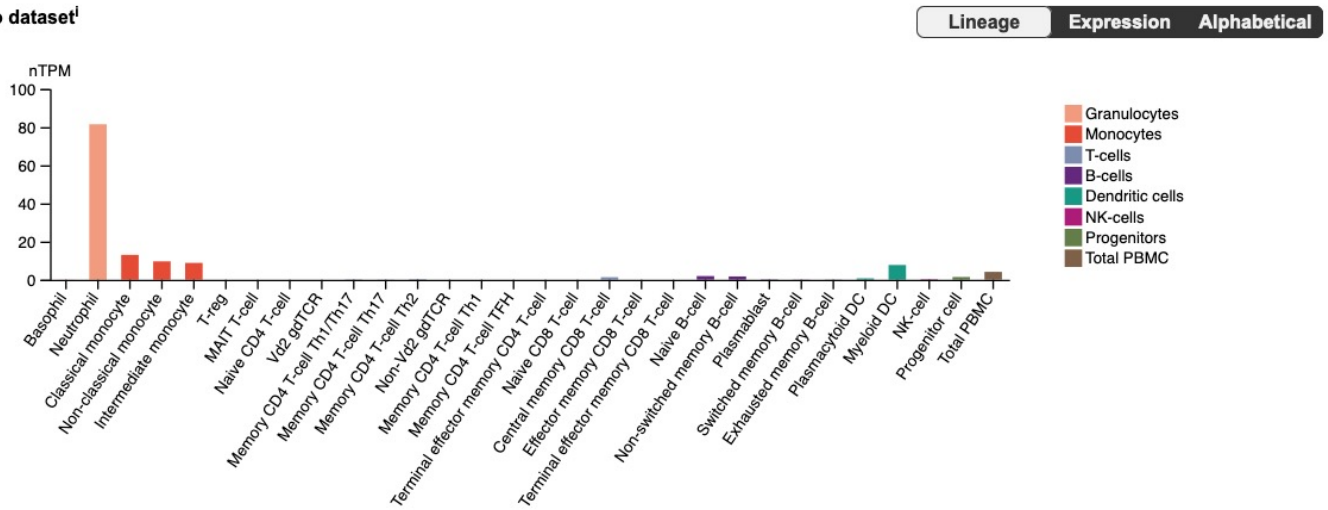

### Supplementary Fig. 3 *WDFY3* expression across tissue and cell types based on data in the Human Protein Atlas resource.

(a) The consensus dataset consists of normalized transcript expression (nTPM) levels for 55 tissue types, created by combining the HPA and GTEx transcriptomics datasets using the internal normalization pipeline. Color-coding is based on tissue groups, each consisting of tissues with functional features in common. (b) Single cell transcriptomics data for 25 tissues and peripheral blood mononuclear cells (PBMCs) were analyzed. These datasets were respectively retrieved from the Single Cell Expression Atlas, the Human Cell Atlas, the Gene Expression Omnibus, the Allen Brain Map, and the European Genome-phenome Archive. (c) The nTPM levels resulting from the internal normalization pipeline are visualized for 29 blood cell types and total PBMCs from Monaco et al, 2019<sup>3</sup>. The panels are screenshots from the Human Protein Atlas resource on November 24, 2021.

**Supplementary Fig. 4**

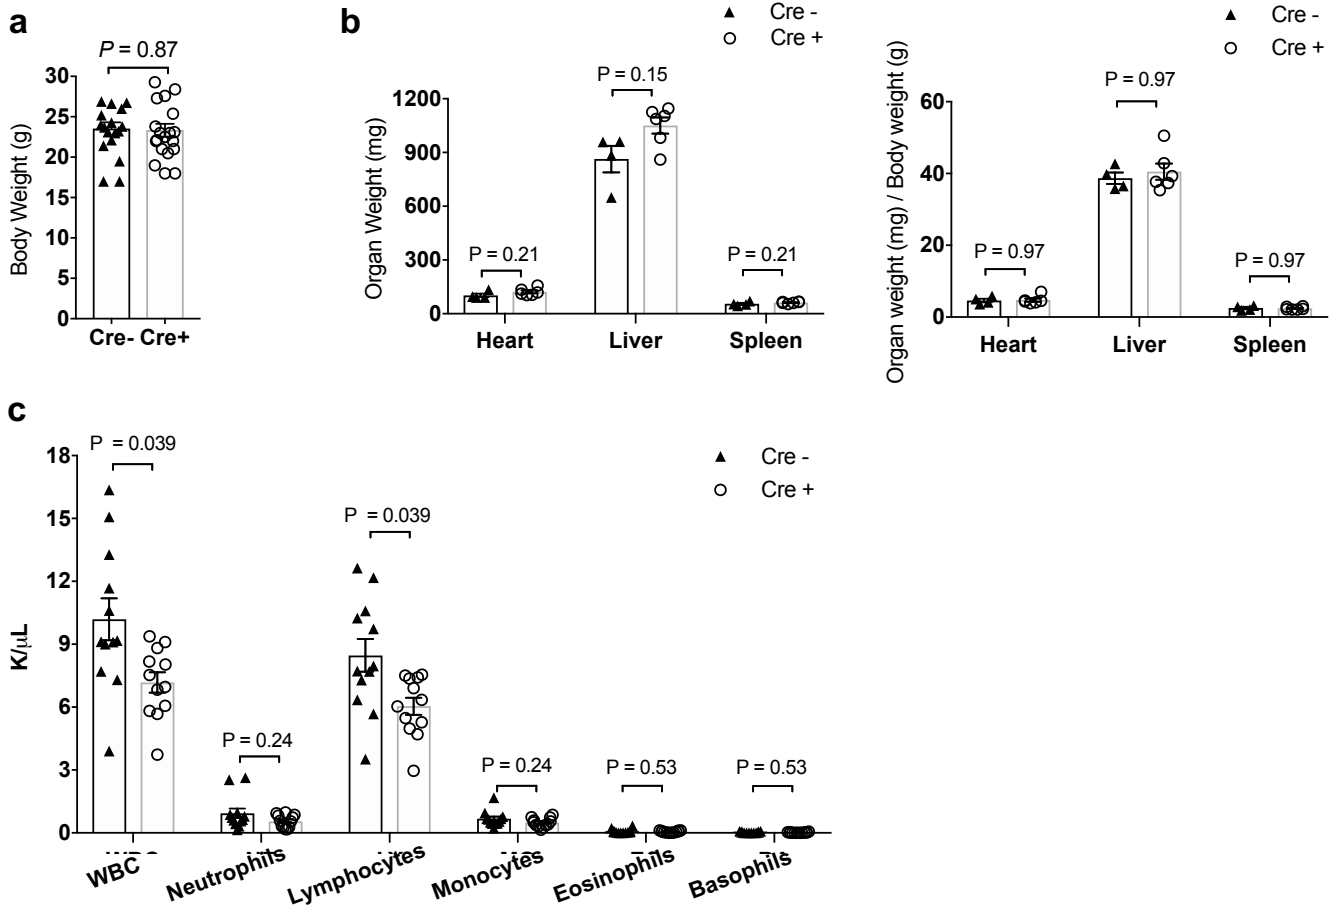

**Supplementary Fig. 4 Basic characteristics of myeloid-specific *Wdfy3* knockout mice.**

(a) Body weight (n = 18 and 20 biological replicates for Cre<sup>-</sup> and Cre<sup>+</sup>, respectively). (b) Organ weight and organ weight normalized to body weight (n = 4 and 6 biological replicates for Cre<sup>-</sup> and Cre<sup>+</sup>, respectively). (c) Complete Blood Count with Differential (n = 12 biological replicates). Data are presented as mean  $\pm$  SEM. Two-sided P values were determined by unpaired t-test. WBC, white blood cells.



**Supplementary Fig. 5**

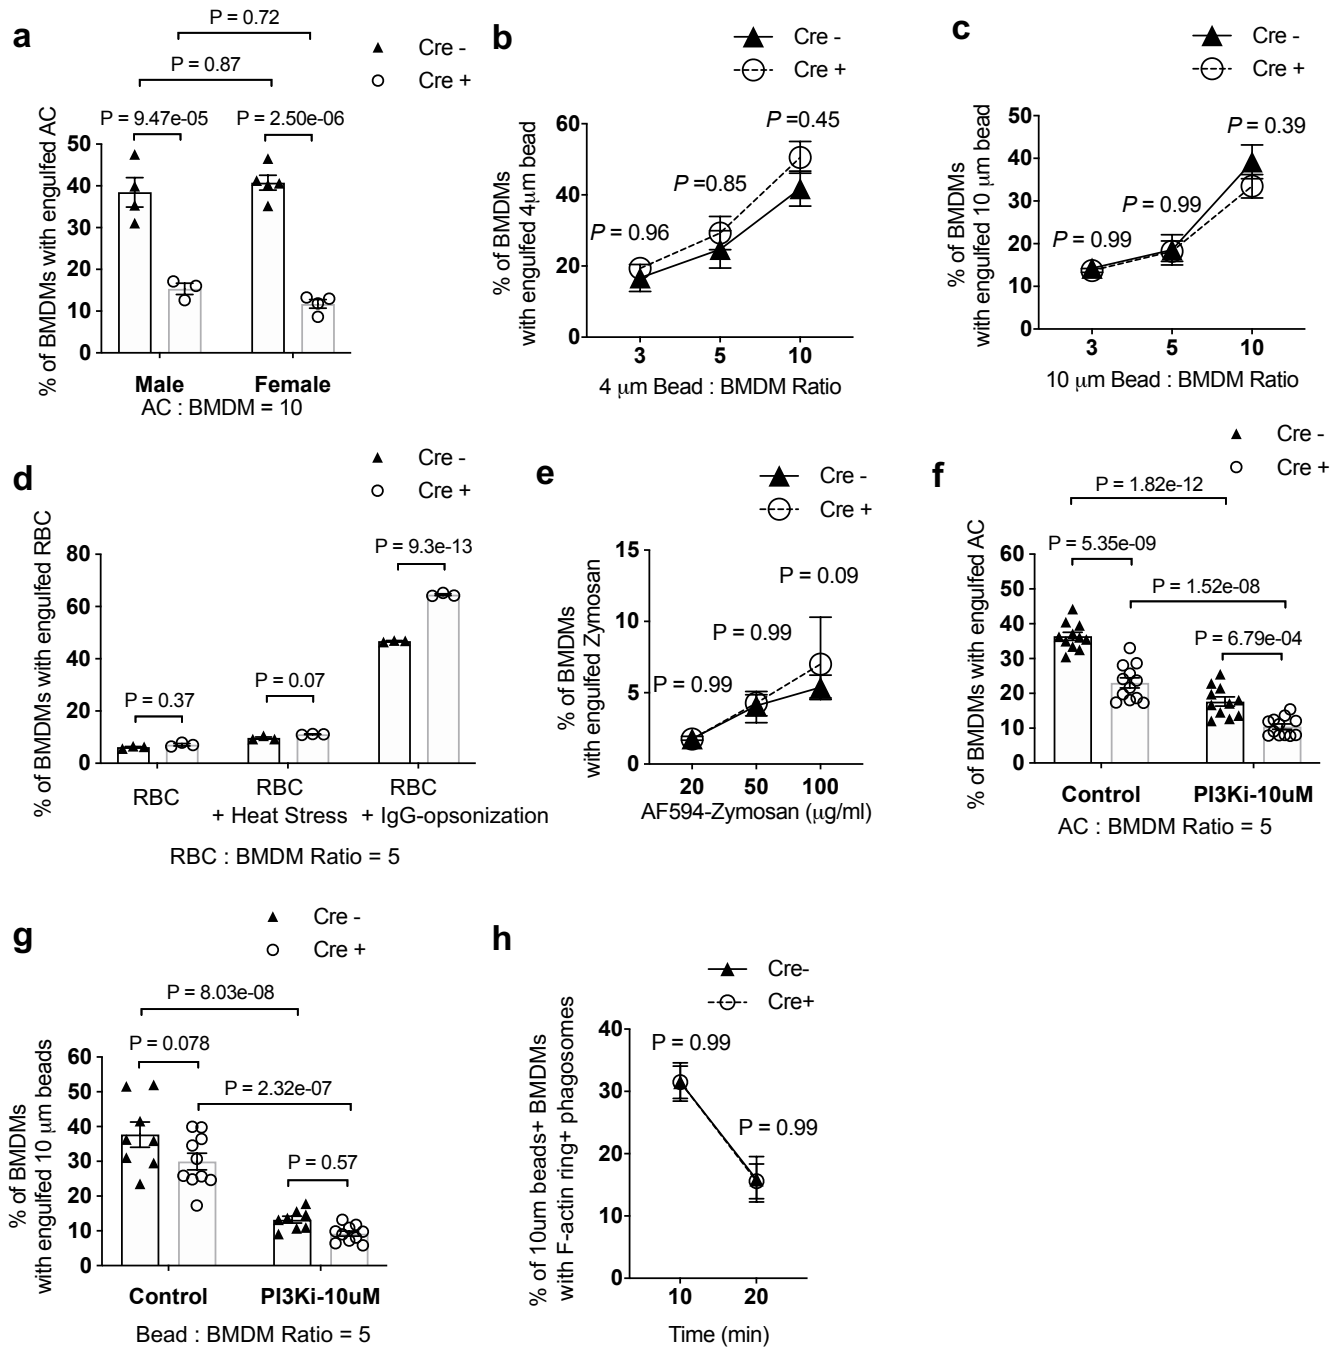

**Supplementary Fig. 5 Phagocytosis of different substrates and the involvement of the PI3K pathway.**

(a) Impaired uptake of ACs were confirmed in both male and female mice (n = 4 and 3 biological replicates each with 2 technical replicates for male mice, n = 5 and 4 biological replicates each with 2 technical replicates for female mice). (b) 4 μm latex beads (n = 3 biological replicates with the average of 2 technical replicates). (c) 10 μm beads (n = 3 biological replicates with the average of 2 technical replicates). (d) Sheep red blood cells (RBCs) were either untreated, heat-stressed, or IgG-opsonized (n = 3 biological replicates with the average of 2 technical replicates). (e) Alexa Fluor (AF)-594 labeled Zymosan particles (n = 6 biological replicates with the average of 2

technical replicates). **(f)** Uptake of ACs by BMDMs with treatment of PI3K inhibitor, LY294002 (n = 11 and 12 biological replicates for Cre<sup>-</sup> and Cre<sup>+</sup>, respectively). **(g)** Uptake of 10  $\mu$ m beads by BMDMs with treatment of PI3K inhibitor, LY294002 (n = 8 and 10 biological replicates for Cre<sup>-</sup> and Cre<sup>+</sup>, respectively). **(h)** BMDMs were stained with CellTracker Green and siR-actin, then incubated with red fluorescent beads for various time points (10 min and 20 min). For each time point, unbound beads were removed and BMDMs were fixed. BMDMs were imaged and the percentage of BMDMs with engulfed beads surrounded by F-actin rings in all BMDMs with engulfed beads was quantified (n = 6 biological replicates). Data are presented as mean  $\pm$  SEM. Two-sided P values were determined by a two-way ANOVA with Tukey's multiple comparisons test.

## Supplementary Fig. 6

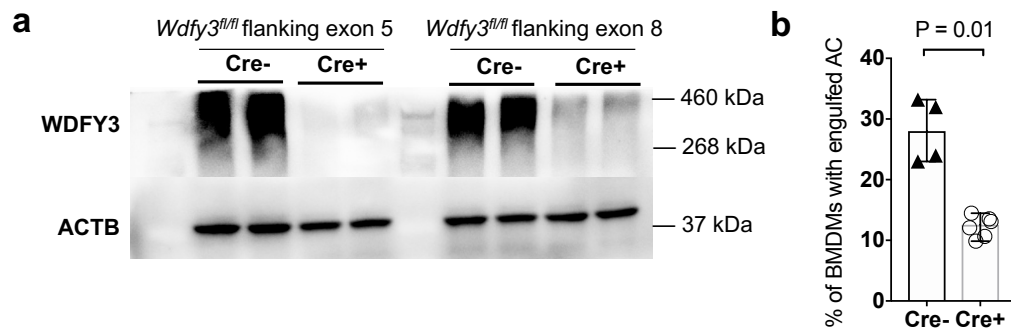

### Supplementary Fig. 6 Validation of impaired efferocytosis in BMDMs from myeloid-specific *Wdfy3* knockout mice on C57BL/6NJ background.

(a) *Wdfy3*<sup>fl/fl</sup> mice generated by the Knock-Out Mouse Project (KOMP) with two *loxP* sites flanking exon 8, were maintained on C57BL/6N background<sup>2</sup>. Breeding to *LysMCre* mice led to efficient knockout of *Wdfy3* though a small amount of residual protein remained detectable (n = 2 biological replicate). (b) Uptake of Hoechst-labeled ACs was impaired in BMDMs of Cre<sup>+</sup> mice with Cre-lox mediated deletion of exon 8 and on C57BL/6NJ background, supporting the role of *Wdfy3* in macrophage efferocytosis independent of the genetic strain and the specific gene-inactivating mutation of the mouse models (n = 4 and 6 biological replicates for Cre<sup>-</sup> and Cre<sup>+</sup>, respectively with the average of 2 technical replicates). Data are presented as median ± 95% CI. Two-sided P values were determined by Mann-Whitney test.

## Supplementary Fig. 7

**a**

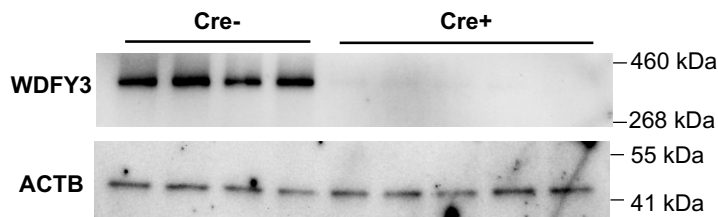

**b**

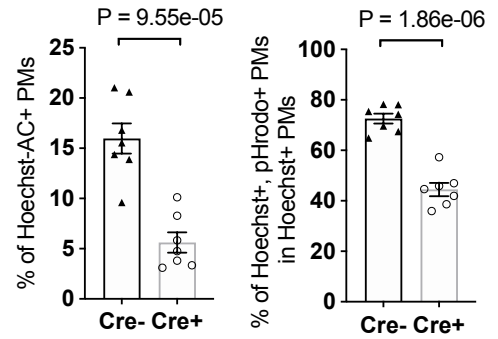

### Supplementary Fig. 7 Validation of knockout, and impaired uptake and acidification in peritoneal macrophages (PMs) of Cre<sup>+</sup> *Wdfy3* knockout mice.

**(a)** Validation of efficient knockout of *Wdfy3* in PMs by western blot (n = 4 and 5 biological replicates for Cre<sup>-</sup> and Cre<sup>+</sup>, respectively as shown in the representative blot). **(b)** Cre<sup>-</sup> and Cre<sup>+</sup> PMs were incubated with ACs labeled by Hoechst, which stains DNA and is pH-insensitive, and pHrodo, which is pH-sensitive and shows fluorescent signal only under an acidified environment in the phagolysosome. The percentage of Hoechst<sup>+</sup> PMs indicates uptake. The percentage of Hoechst<sup>+</sup>/pHrodo<sup>+</sup> PMs in Hoechst<sup>+</sup> PMs indicates acidification of the engulfed cargos (n = 7 biological replicates, each from the average of 2 technical replicates). Data are presented as mean ± SEM. Two-sided P values were determined by unpaired t-test.

## Supplementary Fig. 8

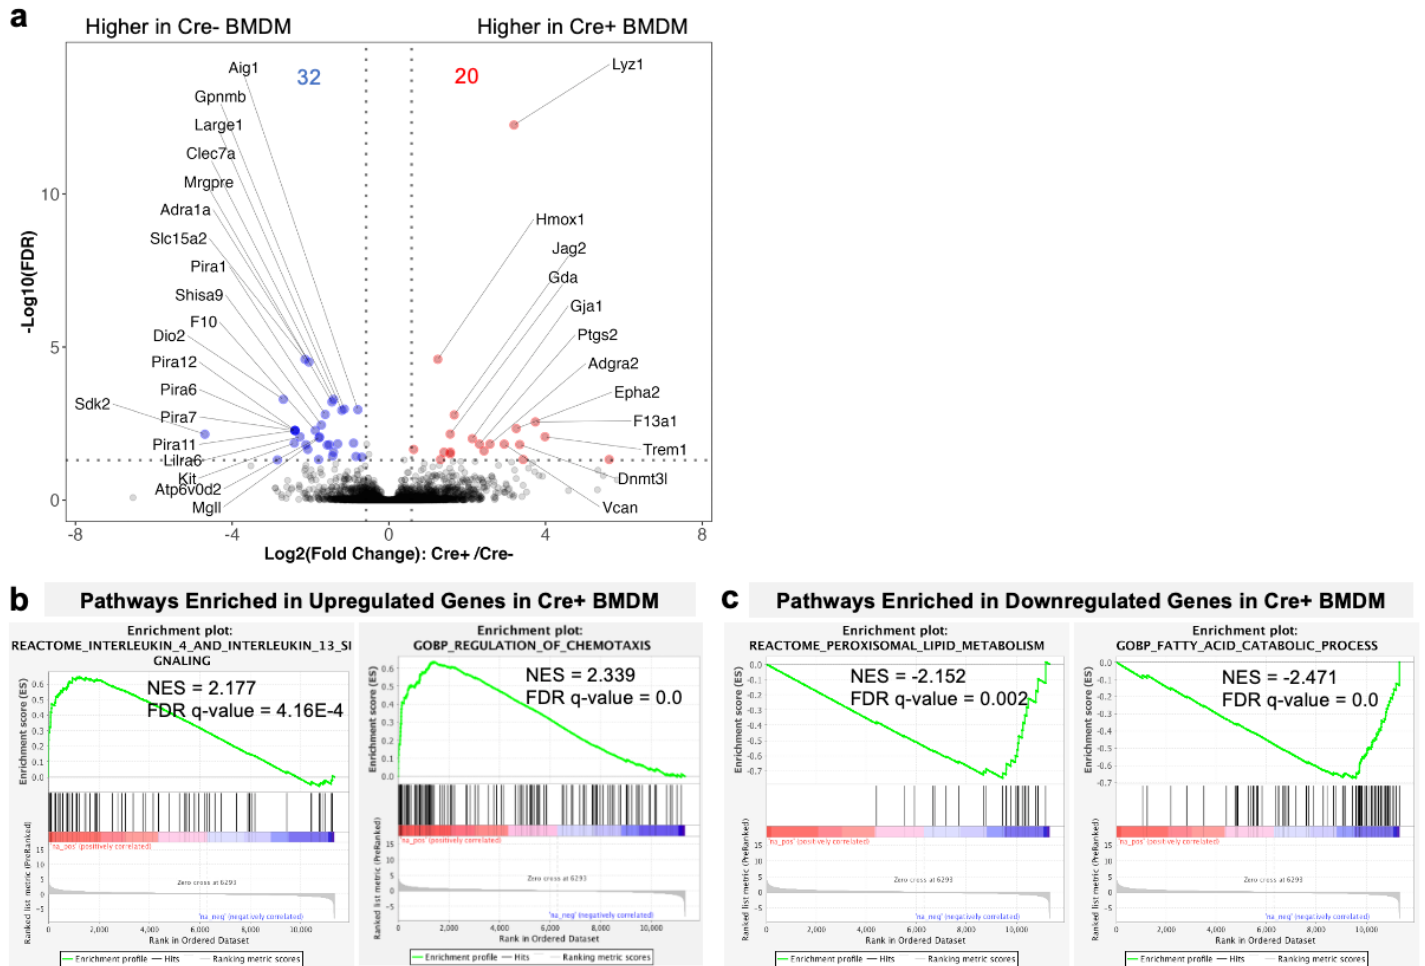

## Supplementary Fig. 8 The effects of *Wdfy3* deficiency on BMDM transcriptomic profile by RNA-seq.

(a) Volcano plot highlights differentially expressed (DE) genes in Cre<sup>+</sup> vs. Cre<sup>-</sup> BMDMs (n = 4 biological replicates, male mice, the DESeq2 output is shown in **Supplementary Data 7**). (b) Selected top Human Reactome Pathway and Gene Ontology Biological Process terms enriched in the upregulated genes in Cre<sup>+</sup> BMDMs vs. Cre<sup>-</sup> BMDMs. Complete GSEA results are shown in **Supplementary Data 8** and **Supplementary Data 9**. (c) Selected top Human Reactome Pathway and Gene Ontology Biological Process terms enriched in the downregulated genes in Cre<sup>+</sup> BMDMs vs. Cre<sup>-</sup> BMDMs. Complete GSEA results are shown in **Supplementary Data 10** and **Supplementary Data 11**.

## Supplementary Fig. 9

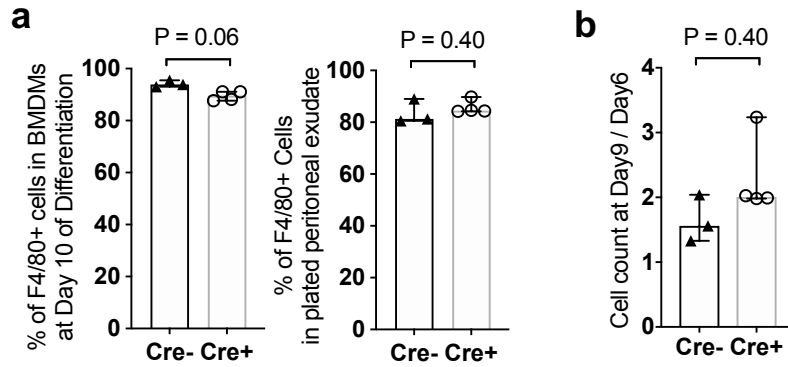

### Supplementary Fig. 9 *Wdfy3* knockout did not affect macrophage differentiation and proliferation.

(a) The percentage of F4/80<sup>+</sup> macrophages in BMDMs and peritoneal exudate was comparable between Cre<sup>-</sup> and Cre<sup>+</sup> mice (n = 3 and 4 biological replicates for Cre<sup>-</sup> and Cre<sup>+</sup>, respectively with an average of 2 technical replicates). (b) Bone marrow (BM) cells were differentiated to BMDMs in 9 days and cell numbers were counted on day 6 and day 9. The ratio of cell counts on day 9 / day 6 implicates population doubling, indicative of proliferation capacity. The ratio shows no statistical difference between Cre<sup>-</sup> and Cre<sup>+</sup> mice (n = 3 and 4 biological replicates for Cre<sup>-</sup> and Cre<sup>+</sup>, respectively). Data are presented as median  $\pm$  95% CI. Two-sided P values were determined by Mann-Whitney test.

**Supplementary Fig. 10**

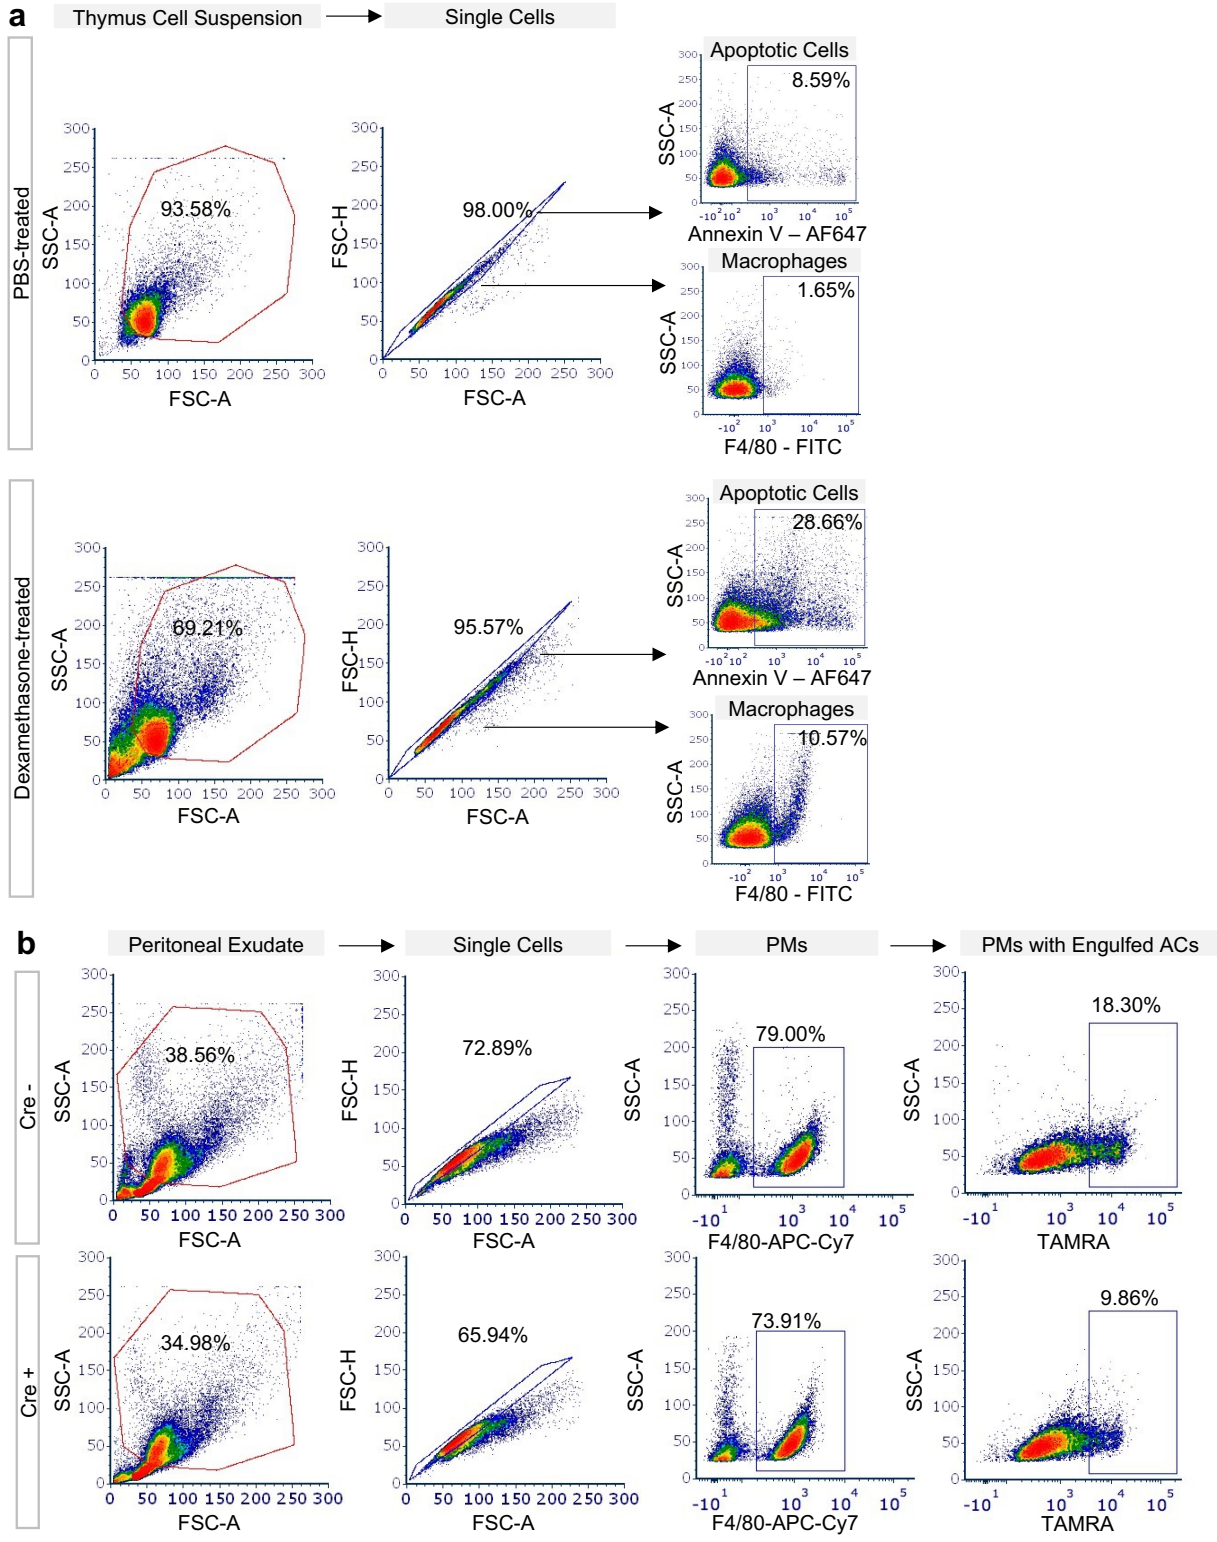

**Supplementary Fig. 10 Gating strategy of flow cytometry analysis.**

**(a)** Gating strategy of flow cytometry analysis for *in vivo* thymus efferocytosis. **(b)** Gating strategy of flow cytometry analysis for *in vivo* peritoneal macrophage efferocytosis.

## Supplementary Fig. 11

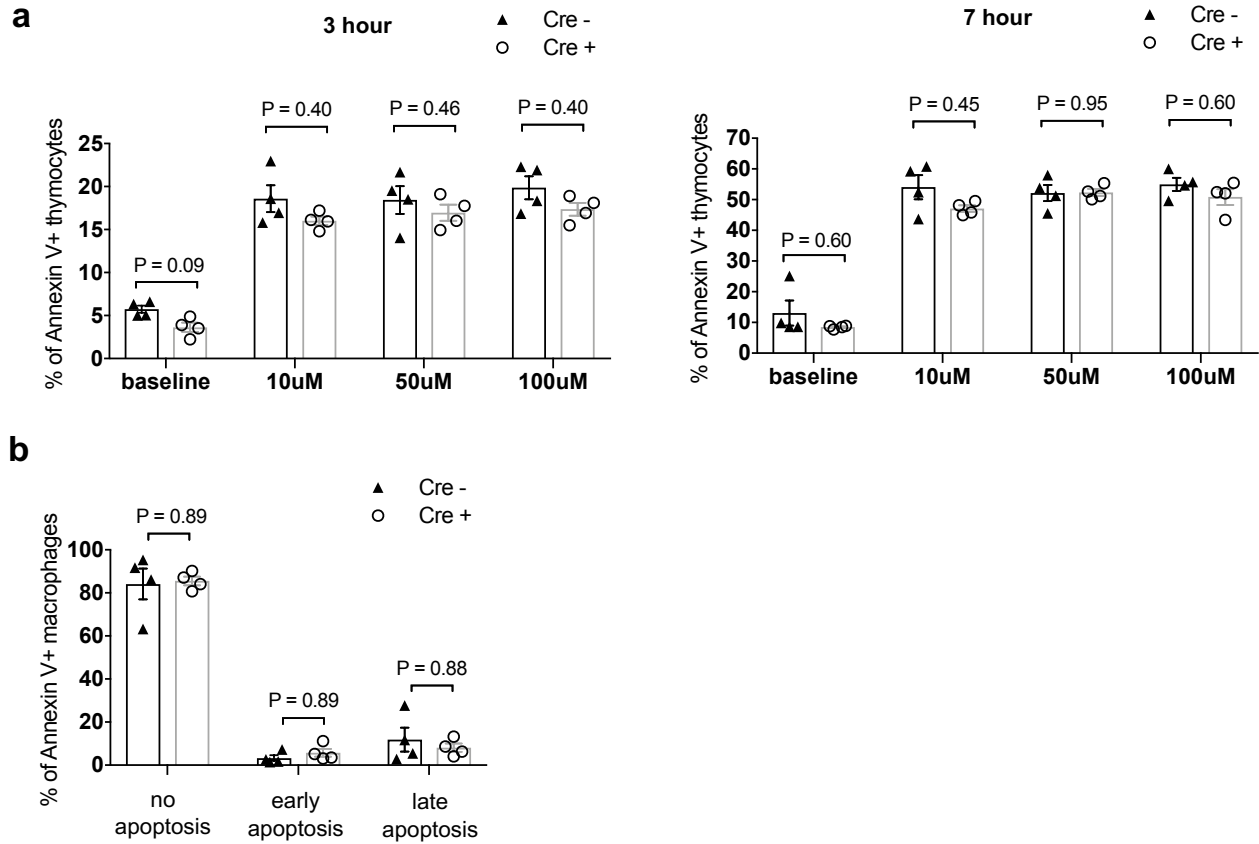

### Supplementary Fig. 11 Myeloid-specific *Wdfy3* knockout did not impact the apoptosis rate induced by dexamethasone in thymocytes and BMDMs.

**(a)** Thymocytes were isolated from Cre<sup>-</sup> and Cre<sup>+</sup> mice and cultured in DMEM media supplemented with 10% FBS at 37 °C, 5% CO<sub>2</sub> with or without dexamethasone treatment at the indicated concentration. The % of Annexin V<sup>+</sup> thymocytes was determined at 3 h and 7 h (n = 4 biological replicates). **(b)** BMDMs were treated with 100 μM dexamethasone in DMEM media supplemented with 10% FBS at 37 °C, 5% CO<sub>2</sub> for 7 h, and the % of Annexin V<sup>+</sup> BMDMs was determined (n = 4 biological replicates). Data are presented as mean ± SEM. Two-sided P values were determined by a two-way ANOVA with Tukey's multiple comparisons test.



## Supplementary Tables

**Supplementary Table 1. Cell Lines and Primary Cells**

| Reagent or Resource                       | Source                | Identifier |
|-------------------------------------------|-----------------------|------------|
| Human: Jurkat cells                       | ATCC                  | TIB-152    |
| Human: THP-1 cells                        | ATCC                  | TIB-202    |
| Human: U937 cells                         | ATCC                  | CRL-1593.2 |
| Human: Peripheral Blood Mononuclear Cells | New York Blood Center | N/A        |
| Mouse: L-929 Fibroblasts                  | ATCC                  | CCL-1      |
| Mouse: Bone Marrow-Derived Macrophages    | This paper            | N/A        |
| Mouse: Peritoneal Macrophages             | This paper            | N/A        |

**Supplementary Table 2. Mice**

| Reagent or Resource                                                 | Source                                                                                | Identifier  |
|---------------------------------------------------------------------|---------------------------------------------------------------------------------------|-------------|
| <i>Wild-type</i> : C57BL/6J                                         | The Jackson Laboratory                                                                | JAX: 000664 |
| <i>GFP-LC3</i> : C57BL/6J                                           | Ai Yamamoto Lab, Eenjes et al., 2016. <sup>4</sup><br>Kuma et al., 2008. <sup>5</sup> | N/A         |
| <i>LysMCre<sup>+/+</sup></i> : C57BL/6J                             | The Jackson Laboratory                                                                | JAX: 004781 |
| <i>Rosa-Cas9</i> knockin: C57BL/6J                                  | The Jackson Laboratory                                                                | JAX: 026179 |
| <i>Wdfy3<sup>fl/fl</sup></i> : 129/SvEv x C57BL/6 (flanking Exon 6) | Ai Yamamoto Lab,<br>Dragich et al., 2016. <sup>6</sup>                                | N/A         |
| <i>Wdfy3<sup>fl/fl</sup></i> : C57BL/6NJ (flanking Exon 8)          | Konstantinos Zarbalis Lab,<br>Orosco, L. A. et al. 2014. <sup>7</sup>                 | N/A         |

**Supplementary Table 3. gRNAs for CRISPR Screen Validation**

| Target              | Source                           | gRNA sequence (5' to 3')               | PAM | Target Context Sequence (5' to 3') |
|---------------------|----------------------------------|----------------------------------------|-----|------------------------------------|
| Arpc4 gRNA          | Brie Library (Addgene Cat#73633) | CTTTGTAATCCACTTCATGG                   | AGG | TGGACTTTGTAATCCACTTCATGGAGGAGA     |
| Cd300a gRNA         | Brie Library (Addgene Cat#73633) | GGGAATAGTCATGTTACGG                    | TGG | CCCTGGGAATAGTCATGTTACGGTGGCCC      |
| Havcr2 gRNA         | Brie Library (Addgene Cat#73633) | CTAAAGGGCGATCTCAACAA                   | AGG | CCAGCTAAAGGGCGATCTCAACAAAGGAGA     |
| Nckap1l gRNA        | Brie Library (Addgene Cat#73633) | GACACGCTGGTATATGCCTG                   | TGG | CTTCGACACGCTGGTATATGCCTGTGGTTG     |
| Non-targeting gRNA1 | Brie Library (Addgene Cat#73633) | GGGGTAGGCCTAATTACGGA                   | N/A | N/A                                |
| Non-targeting gRNA2 | Sigma-Aldrich (Cat# CRISPR18)    | N/A                                    | N/A | N/A                                |
| Wdfy3 gRNA1         | Brie Library (Addgene Cat#73633) | ATGAAGTCTGATGTCATGAG                   | GGG | ACCCATGAAGTCTGATGTCATGAGGGGTCG     |
| Wdfy3 gRNA2         | Sigma-Aldrich                    | Refer to Sanger Clone ID# MM5000009433 | N/A | CATGGTGACGGAGATCCGGAGG             |

**Supplementary Table 4. Plasmids**

| <b>Reagent or Resource</b>                | <b>Source</b>                                              | <b>Identifier</b> |
|-------------------------------------------|------------------------------------------------------------|-------------------|
| pcDNA-myc-WDFY3 <sub>2543-3526</sub>      | Ai Yamamoto Lab,<br>Filimonenko et al., 2010. <sup>8</sup> | N/A               |
| pDEST-tdTomato-WDFY3 <sub>2981-3526</sub> | Ai Yamamoto Lab,<br>Filimonenko et al., 2010. <sup>8</sup> | N/A               |
| pLE4                                      | Fang et al., 2018. <sup>9</sup>                            | N/A               |

**Supplementary Table 5. Primers for Genotyping**

| Strain                                                               | Source                                                             | Forward (5' to 3')               | Reverse (5' to 3')               |
|----------------------------------------------------------------------|--------------------------------------------------------------------|----------------------------------|----------------------------------|
| <i>LysMCre</i> <sup>-/-</sup>                                        | The Jackson Laboratory                                             | CCCAGAAATGCCAGATTACG             | CTTGGGCTGCCAGAATTTCTC            |
| <i>LysMCre</i> <sup>+/-</sup>                                        | The Jackson Laboratory                                             | TTACAGTCGGCCAGGCTGAC             | CTTGGGCTGCCAGAATTTCTC            |
| <i>Wdfy3</i> <sup>fl/fl</sup> : 129/SvEv x C57BL/6 (flanking Exon 6) | Ai Yamamoto Lab, Dragich et al., 2016. <sup>6</sup>                | GAAAGCAAGCTCGTTTACGG             | AGGTTACCAGCCACAACCAG             |
| <i>Wdfy3</i> <sup>fl/fl</sup> : 129/SvEv x C57BL/6 (flanking Exon 6) | Ai Yamamoto Lab, Dragich et al., 2016. <sup>6</sup>                | ACTTGGGAAGAGGGAAGCTC             | AGGTTACCAGCCACAACCAG             |
| <i>Wdfy3</i> <sup>fl/fl</sup> : C57BL/6NJ (flanking Exon 8)          | Konstantinos Zarbalis Lab, Orosco, L. A. et al. 2014. <sup>7</sup> | AGTGCAAATAAAGAACTAAAT<br>TAGAAGG | CATAACTTCGTATAATGTATGC<br>TATACG |
| <i>Wdfy3</i> <sup>fl/fl</sup> : C57BL/6NJ (flanking Exon 8)          | Konstantinos Zarbalis Lab, Orosco, L. A. et al. 2014. <sup>7</sup> | ACAGGTCTCTTTGGCTGAGG             | AATGTCTTGCCTCGGAAAAG             |

**Supplementary Table 6. Primers for quantitative RT-PCR**

| Target              | Source     | Forward (5' to 3')     | Reverse (5' to 3')      |
|---------------------|------------|------------------------|-------------------------|
| Human: <i>ACTB</i>  | PrimerBank | CATGTACGTTGCTATCCAGGC  | CTCCTTAATGTCACGCACGAT   |
| Human: <i>WDFY3</i> | OriGene    | GACAACCTCTGTCTCACTCCTG | GCAAATGGTCCATCACGCTATCC |

**Supplementary Table 7. siRNAs**

| <b>Reagent or Resource</b>                            | <b>Source</b> | <b>Identifier</b> |
|-------------------------------------------------------|---------------|-------------------|
| ON-TARGET plus non-targeting pool                     | Dharmacon     | D-001810-10-05    |
| ON-TARGET plus non-targeting siRNA #1                 | Dharmacon     | D-001810-01-20    |
| ON-TARGET plus Human WDFY3 (23001) siRNA - SMARTpool  | Dharmacon     | L-012924-01-0005  |
| ON-TARGET plus Human WDFY3 (23001) siRNA - Individual | Dharmacon     | J-012924-09-0010  |

**Supplementary Table 8. Antibodies**

| Reagents                                                                | Source                                                 | Identifier                                                                                                 | Dilution and Working Concentration          |
|-------------------------------------------------------------------------|--------------------------------------------------------|------------------------------------------------------------------------------------------------------------|---------------------------------------------|
| CD16/32 (Purified anti-mouse CD16/32), monoclonal, Rat IgG2a, $\lambda$ | BioLegend                                              | Cat# 101302<br>(Reactivity: Mouse)                                                                         | 1:25 (block), 20 $\mu\text{g}/\text{mL}$    |
| Goat anti-rabbit IgG (Fc, HRP), polyclonal, IgG                         | EMD Millipore                                          | Cat# AP156P<br>(Reactivity: Rabbit)                                                                        | 1:5000 (WB), 0.16 $\mu\text{g}/\text{mL}$   |
| Anti- $\beta$ -Actin (13E5, HRP), rabbit monoclonal, IgG                | Cell Signaling Technology                              | Cat# 5125S,<br>Lot 6 (48 $\mu\text{g}/\text{mL}$ )<br>(Reactivity: Human, Mouse, Rat, Monkey, Bovine, Pig) | 1:5000 (WB), 0.0096 $\mu\text{g}/\text{mL}$ |
| Anti-GABARAP (N-term), rabbit polyclonal, IgG                           | Abgent                                                 | Cat# AP1821a<br>(Reactivity: Human, Mouse, Rat)                                                            | 1:1000 (WB), 0.025 $\mu\text{g}/\text{mL}$  |
| Anti-GABARAP + GABARAPL1 + GABARAPL3 (EPR18862), rabbit monoclonal, IgG | Abcam                                                  | Cat# ab191888<br>(Reactivity: Human, Mouse, Rat)                                                           | 9 $\mu\text{g}/\text{mL}$ (IP)              |
| Anti-LC3A/B (D3U4C, PE), rabbit monoclonal, IgG                         | Cell Signaling Technology                              | Cat# 13611S<br>(Reactivity: Human, Mouse, Rat)                                                             | 1:50 (FACS), 0.5 $\mu\text{g}/\text{mL}$    |
| Anti-LC3A/B (D3U4C, Alexa Fluor 488), rabbit monoclonal, IgG            | Cell Signaling Technology                              | Cat# 13082S<br>(Reactivity: Human, Mouse, Rat)                                                             | 1:50 (FACS), 1.2 $\mu\text{g}/\text{mL}$    |
| Anti-LC3B, rabbit polyclonal, IgG                                       | Abcam                                                  | Cat# ab48394<br>(Reactivity: Human, Mouse, Rat)                                                            | 1:1000 (WB), 1 $\mu\text{g}/\text{mL}$      |
| Anti-WDFY3, rabbit monoclonal                                           | Ai Yamamoto Lab,<br>Fox et al.,<br>2020. <sup>10</sup> | Cat# NA<br>(Reactivity: Human, Mouse)                                                                      | 1:1000 (WB)                                 |
| Anti-CD68 (FA-11), rat monoclonal, IgG2a                                | Abcam                                                  | Cat# ab53444<br>(Reactivity: Mouse)                                                                        | 1:200 (IF), 5 $\mu\text{g}/\text{mL}$       |
| Anti-F4/80 (BM8, FITC), rat monoclonal, IgG2a, $\kappa$                 | BioLegend                                              | Cat# 123108<br>(Reactivity: Mouse)                                                                         | 1:200 (FACS), 2.5 $\mu\text{g}/\text{mL}$   |
| Anti-F4/80 (BM8, APC-Cy7), rat monoclonal, IgG2a, $\kappa$              | BioLegend                                              | Cat# 123118<br>(Reactivity: Mouse)                                                                         | 1:200 (FACS), 1 $\mu\text{g}/\text{mL}$     |



**Supplementary Table 9. Cell Culture Medium**

| <b>Reagent or Resource</b>                            | <b>Source</b> | <b>Identifier</b> |
|-------------------------------------------------------|---------------|-------------------|
| CellStripper                                          | Corning       | Cat# 25-056-CI    |
| Dulbecco's Modified Eagle Media (DMEM)                | Corning       | Cat# 10-017-CM    |
| Dulbecco's Phosphate-Buffered Salt Solution 1X (DPBS) | Corning       | Cat# 21-031-CM    |
| Heat-Inactivated Fetal Bovine Serum                   | Gibco         | Cat# 10082147     |
| Opti-MEM I Reduced Serum Medium                       | Gibco         | Cat# 31985070     |
| Roswell Park Memorial Institute (RPMI) 1640 Media     | Corning       | Cat# 10-041-CM    |

**Supplementary Table 10. Chemicals and Recombinant Cytokines**

| <b>Reagent or Resource</b>                         | <b>Source</b> | <b>Identifier</b> |
|----------------------------------------------------|---------------|-------------------|
| Cytochalasin D                                     | Sigma-Aldrich | Cat# C8273        |
| Dexamethasone                                      | Sigma-Aldrich | Cat# 265005-100MG |
| Digitonin                                          | Sigma-Aldrich | Cat# D141-500MG   |
| Human Macrophage Colony Stimulating Factor (M-CSF) | Goldbio       | Cat# 1120-09-100  |
| LY294002                                           | Sigma-Aldrich | Cat# 440204-1MG   |
| Puromycin                                          | Sigma-Aldrich | Cat# 540411-25MG  |
| Staurosporine                                      | Alfa Aesar    | Cat# J62837-M^    |

**Supplementary Table 11. Commercial Assay Kits**

| <b>Reagent or Resource</b>                        | <b>Source</b>      | <b>Identifier</b> |
|---------------------------------------------------|--------------------|-------------------|
| BCA Protein Assay Kit                             | Thermo Scientific  | Cat# 23227        |
| DNeasy Blood and Tissue Kit                       | Qiagen             | Cat# 69504        |
| High-Capacity cDNA Reverse Transcription Kit      | Applied Biosystems | Cat# 4368814      |
| In Situ Cell Death Detection Kit, TMR red (TUNEL) | Roche              | Cat# 12156792910  |
| Quick-RNA Mini Kit                                | Zymo               | Cat# R1055        |
| West Pico PLUS Chemiluminescent Substrate         | Thermo Scientific  | Cat# 34580        |

**Supplementary Table 12. Reagents for Efferocytosis and Phagocytosis Assays**

| Reagent or Resource                                                                                   | Source                      | Identifier         |
|-------------------------------------------------------------------------------------------------------|-----------------------------|--------------------|
| Annexin V Conjugates for Apoptosis Detection                                                          | Invitrogen                  | Cat# A23204        |
| CellTracker Green CMFDA Dye                                                                           | Invitrogen                  | Cat# C2925         |
| CellTracker Deep Red Dye                                                                              | Invitrogen                  | Cat# C34565        |
| CellMask Deep Red Actin Tracking Stain                                                                | Invitrogen                  | Cat# A57245        |
| CellMask Green Actin Tracking Stain                                                                   | Invitrogen                  | Cat# A57243        |
| Diluent C                                                                                             | Sigma-Aldrich               | Cat# CGLDIL-6X10ML |
| FluoSpheres Sulfate Microspheres, 4.0 $\mu$ m, red fluorescent (580/605)                              | Invitrogen                  | Cat# F8858         |
| FluoSpheres Polystyrene Microspheres, 10 $\mu$ m, blue-green fluorescent (430/465)                    | Invitrogen                  | Cat# F8830         |
| FluoSpheres Polystyrene Microspheres, 10 $\mu$ m, orange fluorescent (540/560)                        | Invitrogen                  | Cat# F8833         |
| FluoSpheres Polystyrene Microspheres, 10 $\mu$ m, red fluorescent (580/605)                           | Invitrogen                  | Cat# F8834         |
| HCS NuclearMask™ Blue Stain                                                                           | Invitrogen                  | Cat# H10325        |
| Hoechst 33342 Solution                                                                                | Thermo Scientific           | Cat# 62249         |
| PBS (1X)                                                                                              | Corning                     | Cat# 21-040-CV     |
| PBS (10X)                                                                                             | Corning                     | Cat# 46-013-CM     |
| pHrodo Red, succinimidyl ester                                                                        | Invitrogen                  | Cat# P36600        |
| PKH26 Red Fluorescent Cell Linker Kit for General Cell Membrane Labeling                              | Sigma-Aldrich               | Cat# PKH26GL-1KT   |
| PKH67 Green Fluorescent Cell Linker Kit for General Cell Membrane Labeling                            | Sigma-Aldrich               | Cat# PKH67GL-1KT   |
| Sheep Red Blood Cells 10% washed pooled cells                                                         | Rockland<br>Immunochemicals | Cat# R405-0050     |
| Sheep Red Blood Cell RBC Antibody                                                                     | Rockland<br>Immunochemicals | Cat# 213-4139      |
| siR-actin                                                                                             | Cytoskeleton                | Cat# CY-SC001      |
| TAMRA, SE (5-(and-6)-Carboxytetramethylrhodamine, Succinimidyl Ester (5(6)-TAMRA, SE), mixed isomers) | Invitrogen                  | Cat# C1171         |
| Zymosan A ( <i>S. cerevisiae</i> ) BioParticles, Alexa Fluor 594 conjugate                            | Invitrogen                  | Cat# Z23374        |

**Supplementary Table 13. Other Reagents and Supplies**

| Reagent or Resource                                          | Source             | Identifier        |
|--------------------------------------------------------------|--------------------|-------------------|
| Ficoll-Paque Premium                                         | Sigma-Aldrich      | Cat# GE17-5442-02 |
| Pierce 16% Formaldehyde (w/v), Methanol-free                 | Thermo Scientific  | Cat# 28908        |
| Fugene 6                                                     | Promega            | Cat# E2691        |
| Immun-Blot PVDF Membrane, 0.2 $\mu$ m                        | Bio-rad            | Cat# 1620177      |
| Lenti-X Concentrator                                         | Takara Bio         | Cat# 631231       |
| Lipofectamine RNAiMAX Transfection Reagent                   | Invitrogen         | Cat# 13778100     |
| $\mu$ -Slide 8 Well                                          | Ibidi              | Cat# 80826        |
| NuPAGE 3 to 8%, Tris-Acetate, 1.5 mm, Mini Protein Gel       | Invitrogen         | Cat# EA0378BOX    |
| Novex Bolt LDS Sample Buffer (4X)                            | invitrogen         | Cat# B0007        |
| Novex Bolt Sample Reducing Agent (10X)                       | Invitrogen         | Cat# B0009        |
| Novex WedgeWell 16%, Tris-Glycine, 1.0 mm, Mini Protein Gels | Invitrogen         | Cat# XP00165BOX   |
| P3 Primary Cell 4D-Nucleofector™ X Kit S                     | Lonza              | Cat# V4XP-3032    |
| Power SYBR Green PCR Master Mix                              | Applied Biosystems | Cat# 4367659      |
| Protease Inhibitor Cocktail                                  | Roche              | Cat# 11697498001  |
| Protein A/G Agarose Beads                                    | Thermo Scientific  | Cat# 20421        |
| PVDF Transfer Membrane, 0.45 $\mu$ m                         | Thermo Scientific  | Cat# 88518        |
| RIPA Lysis Buffer, 10X                                       | Millipore Sigma    | Cat# 20-188       |

**Supplementary Table 14. Software and Algorithms**

| Reagent or Resource              | Source                                    | Identifier                                                                                                                                                   |
|----------------------------------|-------------------------------------------|--------------------------------------------------------------------------------------------------------------------------------------------------------------|
| BD FACSDiva                      | BD Biosciences                            | V9.0                                                                                                                                                         |
| DESeq2                           | Love et al., 2018. <sup>11</sup>          | <a href="https://bioconductor.org/packages/release/bioc/html/DESeq2.html">https://bioconductor.org/packages/release/bioc/html/DESeq2.html</a><br>v1.38.1     |
| FCS Express                      | De Novo Software                          | Research Version 7                                                                                                                                           |
| FIJI                             | NIH                                       | <a href="https://fiji.sc/">https://fiji.sc/</a><br>v2.3.0 Java 1.8.0_202                                                                                     |
| GSEA                             | Subramanian et al., 2005. <sup>12</sup>   | Version 4.2.0                                                                                                                                                |
| ImageJ JACoP                     | NIH and Bolte et al., 2006. <sup>13</sup> | ImageJ bundled with 64-bit Java 1.8.0_172<br>JACoP (Just Another Colocalization Plugin <sup>13</sup> version 2.0)                                            |
| Ingenuity Pathway Analysis (IPA) | Qiagen                                    | 2022 License                                                                                                                                                 |
| MAGECK                           | Li et al., 2014. <sup>14</sup>            | <a href="https://sourceforge.net/p/mageck/wiki/Home/">https://sourceforge.net/p/mageck/wiki/Home/</a><br>v0.5.7                                              |
| MetaXpress                       | Molecular Devices                         | Version 6                                                                                                                                                    |
| NIS-Elements                     | Nikon                                     | Version 5.11                                                                                                                                                 |
| PRISM                            | GraphPad Software                         | Version 7                                                                                                                                                    |
| Salmon                           | Patro et al., 2017. <sup>15</sup>         | <a href="https://combine-lab.github.io/salmon/">https://combine-lab.github.io/salmon/</a><br>v1.5.1                                                          |
| tximport                         | Soneson et al., 2015. <sup>16</sup>       | <a href="https://bioconductor.org/packages/release/bioc/html/tximport.html">https://bioconductor.org/packages/release/bioc/html/tximport.html</a><br>v1.26.0 |

## Supplementary Notes

### Supplementary Note 1

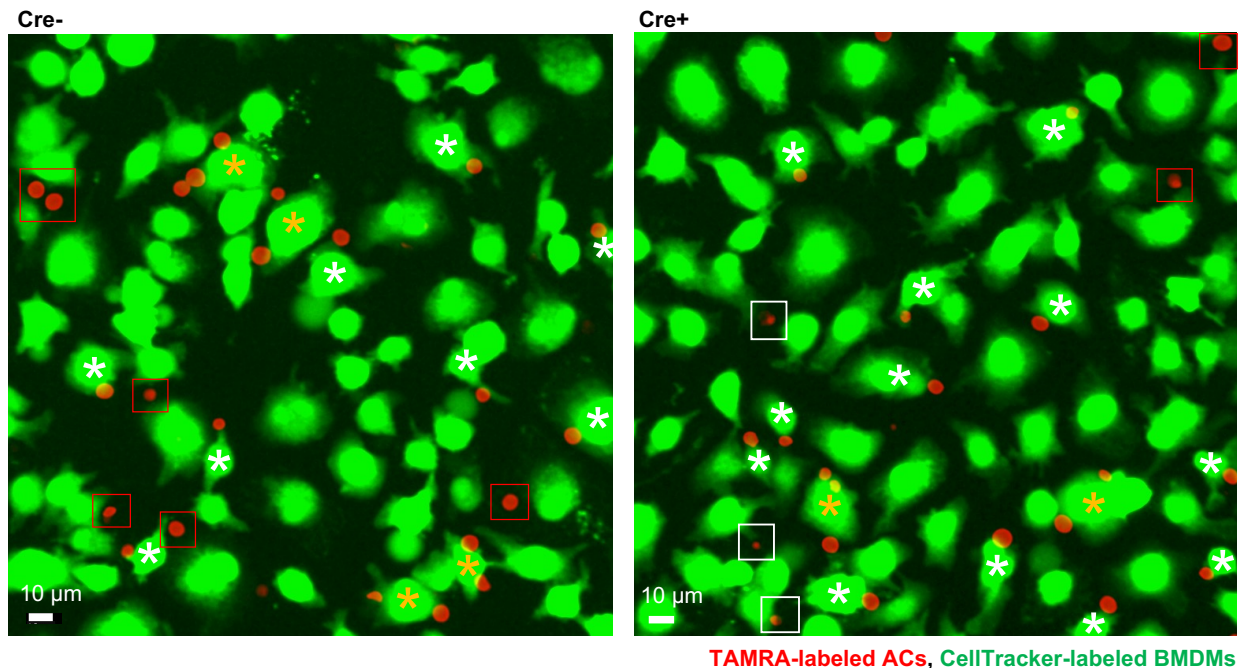

#### Supplementary Note 1 Quantification of binding assay.

- **The goal of the quantification:**

Score the macrophages with no AC bound (0), with one AC bound (1), and with two or more than two ACs bound (>2), as shown in **Fig. 2e**.

- **The labeling:**

The CellTracker Green CMFDA fluorescent dye has been designed to freely pass through cell membranes into cells, where it is transformed into a cell-impermeant, fluorescent product, and used for labeling macrophages. ACs were labeled by TAMRA that stains proteins and peptides.

- **Image preprocessing:**

To facilitate the scoring of whether ACs are bound to macrophages on the 2D images, we first adjust brightness and contrast for all images to be quantified to improve visualization of the cell contour (as shown in the representative images above). Extra care was taken not to introduce artifacts, including to overlay the adjusted images with phase-contrast images to confirm cell contour can be visualized consistently.

- **Exclusion criteria:**

Because the images were taken at one focal plane, we only quantify the macrophages and ACs with bright signals because cells at different focal planes showing weaker signals do not allow precise scoring. **White square** highlights TAMRA signals excluded from the analyses because the small size likely suggests debris.

- **Scoring criteria:**

The TAMRA-labeled ACs and CellTracker Green-labeled macrophages in close contact are scored as “bound” and counted. In the representative images, **white \*** denotes macrophages with one bound AC (1), **orange \*** denotes macrophages with two or more bound ACs (>2), **red squares** highlight the ACs not bound to any macrophages. The investigator is blinded from the genotype while performing scoring.

## Supplementary Note 2

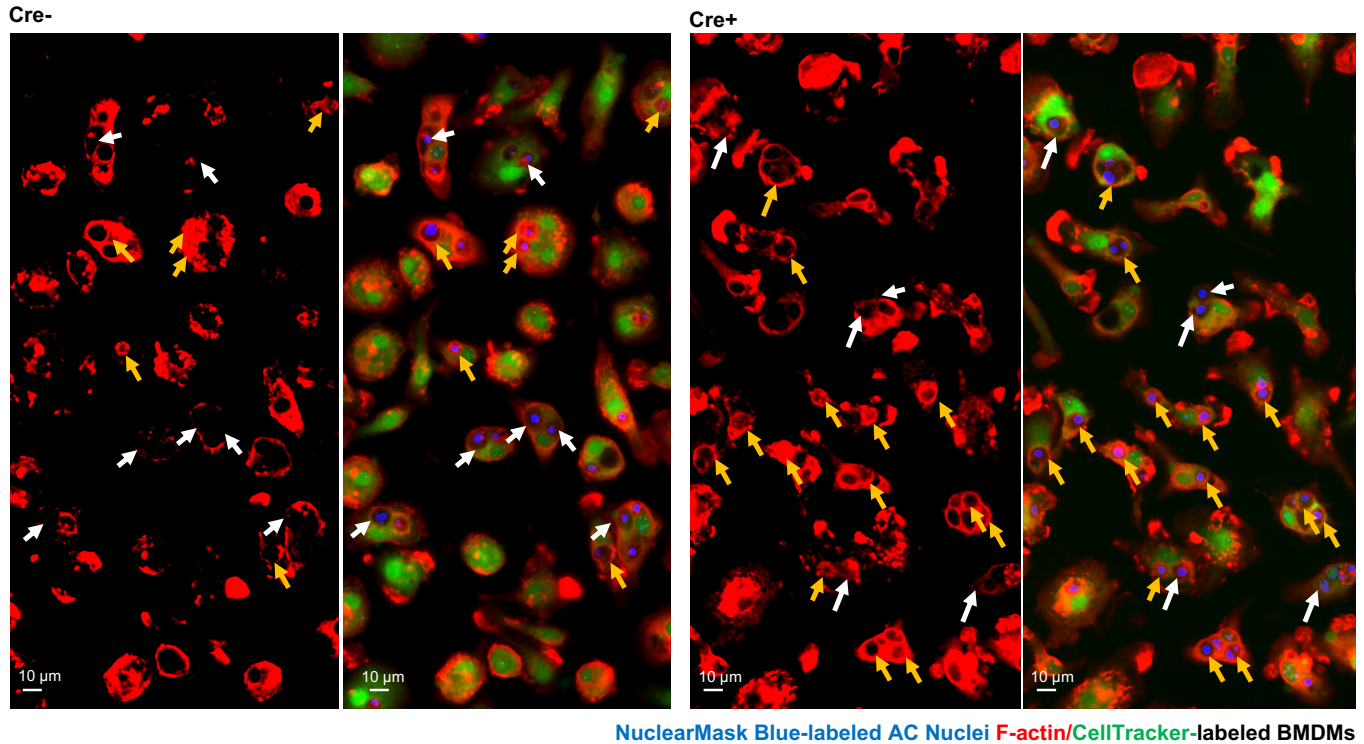

### Supplementary Note 2 Quantification of F-actin-ring surrounded engulfed ACs.

- **The goal of the quantification:**  
Score the macrophages with engulfed ACs surrounded by a F-actin ring, as shown in **Fig. 2h**, quantified as the percentage of macrophages with F-actin ring surrounded ACs in the macrophages with engulfed ACs.
- **The labeling:**  
The CellTracker Green CMFDA fluorescent dye labels the macrophages. Macrophages were also labeled with siR-actin, a fluorogenic, cell-permeable probe based on a highly specific F-actin binding natural product jasplakinolide, therefore can visualize F-actin. ACs were labeled by NuclearMask Blue that stains nuclear DNAs.
- **Image preprocessing:**  
F-actin only and the merged images were compared in parallel in order to better determine the presence of “ring”-like morphology of the F-actin staining.
- **Exclusion criteria:**  
Cutoff to size was applied to NuclearMask Blue staining because small size likely suggests debris.
- **Scoring criteria:**  
The first step was to determine if a macrophage has engulfed a NuclearMask Blue-labeled AC. Because the size of the AC is ~10 µm, the NuclearMask Blue-stained nuclei of the engulfed AC and the unstained cytoplasmic area around the AC nuclei can be clearly identified within CellTracker-labeled macrophages. The presence of F-actin ring can be determined by referring both the F-actin only and the merged images. A continued F-actin staining surrounded the engulfed ACs by macrophages is scored as macrophages with engulfed AC with F-actin ring and denoted by **orange arrows**. An absence or discontinued F-actin staining is scored as macrophages without F-actin ring and denoted by **white arrows**. The investigator is blinded from the genotype while performing scoring.



### Supplementary Note 3

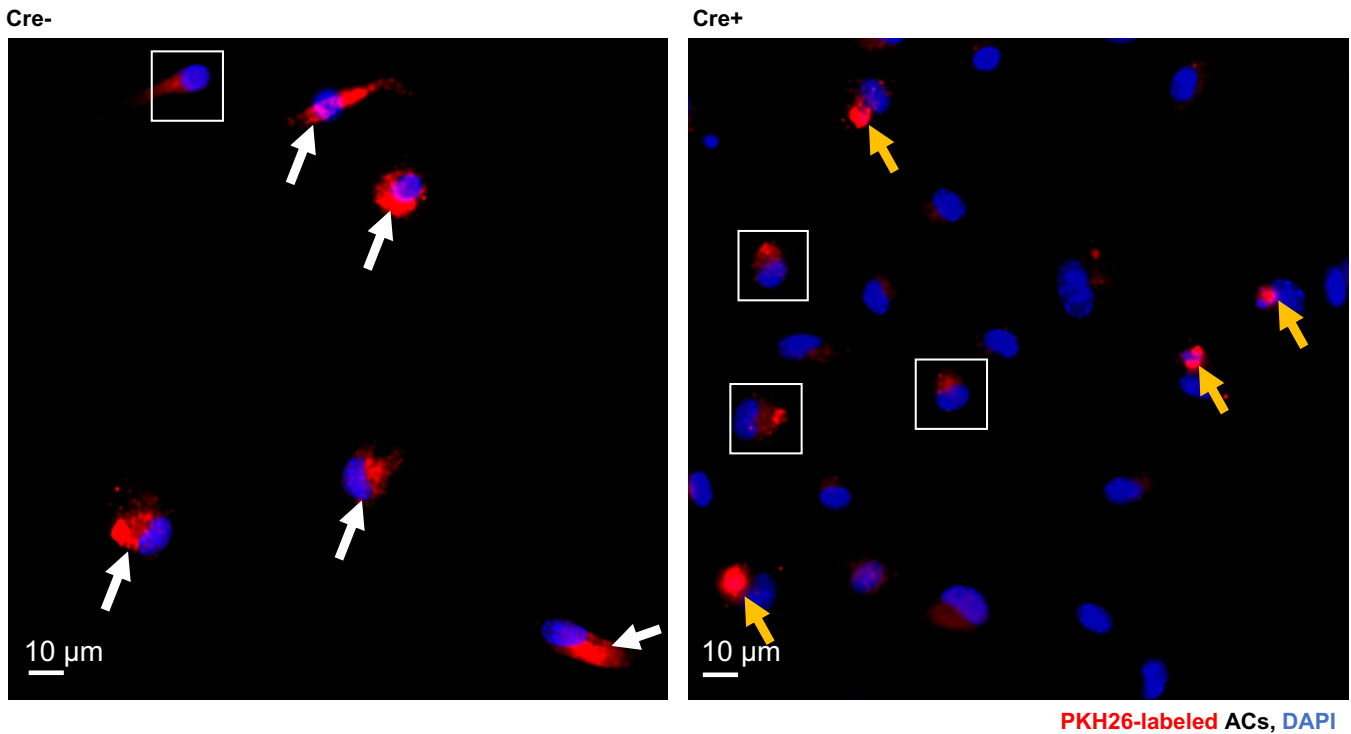

#### Supplementary Note 3 Quantification of non-fragmented ACs (for BMDM and HMDM)

- **The goal of the quantification:**  
Score the macrophages with non-fragmented engulfed ACs, implying impaired degradation, as shown in **Fig. 3a** (and **Fig. 6e**), quantified as the ratio of the number of macrophages with non-fragmented ACs by the total number of macrophages with engulfed ACs.
- **The labeling:**  
ACs were labeled by PKH26 red fluorescence dye. The PKH lipophilic dyes are highly fluorescent and stain membranes by intercalating their aliphatic portion into the exposed lipid bilayer<sup>17</sup>. DAPI was used to stain nuclear DNA (in both ACs and macrophages).
- **Image preprocessing:**  
N/A.
- **Exclusion criteria:**  
Macrophages with weak and pixelated red signals without an visible AC nuclei stained by DAPI are macrophages that engulfed cell debris, as denoted by **white squares**. Those macrophages were not scored as macrophage with engulfed ACs.
- **Scoring criteria:**  
Macrophages with PKH26 signal in a circular shape without obvious pattern of fragments were scored as “non-fragmented” and denoted by **orange arrows**. Macrophages with PKH26 signal in an irregular shape and a fragmented pattern were scored as “fragmented”. The investigator is blinded from the genotype while performing scoring.

## Supplementary References

- 1 Haney, M. S. *et al.* Identification of phagocytosis regulators using magnetic genome-wide CRISPR screens. *Nature genetics* **50**, 1716-1727, doi:10.1038/s41588-018-0254-1 (2018).
- 2 Kamber, R. A. *et al.* Inter-cellular CRISPR screens reveal regulators of cancer cell phagocytosis. *Nature* **597**, 549-554, doi:10.1038/s41586-021-03879-4 (2021).
- 3 Monaco, G. *et al.* RNA-Seq Signatures Normalized by mRNA Abundance Allow Absolute Deconvolution of Human Immune Cell Types. *Cell reports* **26**, 1627-1640.e1627, doi:10.1016/j.celrep.2019.01.041 (2019).
- 4 Eenjes, E., Dragich, J. M., Kampinga, H. H. & Yamamoto, A. Distinguishing aggregate formation and aggregate clearance using cell-based assays. *Journal of cell science* **129**, 1260-1270, doi:10.1242/jcs.179978 (2016).
- 5 Kuma, A. & Mizushima, N. Chromosomal mapping of the GFP-LC3 transgene in GFP-LC3 mice. *Autophagy* **4**, 61-62, doi:10.4161/auto.4846 (2008).
- 6 Dragich, J. M. *et al.* Autophagy linked FYVE (Alfy/WDFY3) is required for establishing neuronal connectivity in the mammalian brain. *eLife* **5**, doi:10.7554/eLife.14810 (2016).
- 7 Orosco, L. A. *et al.* Loss of Wdfy3 in mice alters cerebral cortical neurogenesis reflecting aspects of the autism pathology. *Nature communications* **5**, 4692, doi:10.1038/ncomms5692 (2014).
- 8 Filimonenko, M. *et al.* The selective macroautophagic degradation of aggregated proteins requires the PI3P-binding protein Alfy. *Molecular cell* **38**, 265-279, doi:10.1016/j.molcel.2010.04.007 (2010).
- 9 Fang, J. *et al.* Metformin alleviates human cellular aging by upregulating the endoplasmic reticulum glutathione peroxidase 7. *Aging Cell* **17**, e12765, doi:10.1111/ace1.12765 (2018).
- 10 Fox, L. M. *et al.* Huntington's Disease Pathogenesis Is Modified In Vivo by Alfy/Wdfy3 and Selective Macroautophagy. *Neuron* **105**, 813-821.e816, doi:10.1016/j.neuron.2019.12.003 (2020).
- 11 Love, M. I., Soneson, C. & Patro, R. Swimming downstream: statistical analysis of differential transcript usage following Salmon quantification. *F1000Res* **7**, 952, doi:10.12688/f1000research.15398.3 (2018).
- 12 Subramanian, A. *et al.* Gene set enrichment analysis: a knowledge-based approach for interpreting genome-wide expression profiles. *Proceedings of the National Academy of Sciences of the United States of America* **102**, 15545-15550, doi:10.1073/pnas.0506580102 (2005).
- 13 Bolte, S. & Cordelières, F. P. A guided tour into subcellular colocalization analysis in light microscopy. *J Microsc* **224**, 213-232, doi:10.1111/j.1365-2818.2006.01706.x (2006).
- 14 Li, W. *et al.* MAGeCK enables robust identification of essential genes from genome-scale CRISPR/Cas9 knockout screens. *Genome biology* **15**, 554, doi:10.1186/s13059-014-0554-4 (2014).
- 15 Patro, R., Duggal, G., Love, M. I., Irizarry, R. A. & Kingsford, C. Salmon provides fast and bias-aware quantification of transcript expression. *Nature methods* **14**, 417-419, doi:10.1038/nmeth.4197 (2017).
- 16 Soneson, C., Love, M. I. & Robinson, M. D. Differential analyses for RNA-seq: transcript-level estimates improve gene-level inferences. *F1000Res* **4**, 1521, doi:10.12688/f1000research.7563.2 (2015).
- 17 Pužar Dominkuš, P. *et al.* PKH26 labeling of extracellular vesicles: Characterization and cellular internalization of contaminating PKH26 nanoparticles. *Biochim Biophys Acta Biomembr* **1860**, 1350-1361, doi:10.1016/j.bbamem.2018.03.013 (2018).
