# Supplementary material for: A genome-wide CRISPR screen identifies WDFY3 as a regulator of macrophage efferocytosis
Source: PubMed Central journal article supplement (PMC9789999; doi:10.1038/s41467-022-35604-8), 2022-12-24
Supplement: 41467_2022_35604_MOESM3_ESM.pdf [file 41467_2022_35604_MOESM3_ESM.pdf]

## Description of Additional Supplementary Files

A Genome-wide CRISPR Screen Identifies WDFY3 as a Regulator of Macrophage Efferocytosis

Jianting Shi, Xun Wu et al.

### Supplementary Data

**Supplementary Data 1:**

MAGeCK Analysis of CRISPR Screening of Macrophage Efferocytosis: Input vs. Non-eaters

**Supplementary Data 2:**

MAGeCK Analysis of CRISPR Screening of Macrophage Efferocytosis: Input vs. Efficient Eaters

**Supplementary Data 3:**

MAGeCK Analysis of CRISPR Screening of Macrophage Efferocytosis: Non-eaters vs. Efficient Eaters

**Supplementary Data 4:**

Canonical Pathway Analysis of Positive Regulators by Ingenuity Pathway Analysis (IPA)

**Supplementary Data 5:**

Canonical Pathway Analysis of Negative Regulators by IPA

**Supplementary Data 6:**

Comparing the Top-ranked Positive Regulators by Our Screen and Previous Screens in Monocytic Cell Line-derived Macrophages

**Supplementary Data 7:**

DESeq2 Results of RNA-seq of Cre<sup>-</sup> and Cre<sup>+</sup> BMDMs

**Supplementary Data 8:**

GSEA Output of Human Reactome Pathway Enriched in Upregulated Genes in Cre<sup>+</sup> BMDMs

**Supplementary Data 9:**

GSEA Output of Gene Ontology Biological Process Terms Enriched in Upregulated Genes in Cre<sup>+</sup> BMDMs

**Supplementary Data 10:**

GSEA Output of Human Reactome Pathway Enriched in Downregulated Genes in Cre<sup>+</sup> BMDMs

**Supplementary Data 11:**

GSEA Output of Gene Ontology Biological Process Terms Enriched in Downregulated Genes in Cre<sup>+</sup> BMDMs

## **Supplementary Movies**

### **Supplementary Movie 1: Synchronized F-actin polymerization and depolymerization during efferocytosis.**

Bone-marrow-derived macrophages (BMDMs) from wild-type C57BL/6J mice were transfected with LifeAct-tagGFP2 mRNA encoding a fusion protein of LifeAct and a GFP reporter for visualization of cellular F-actin. The transfected BMDMs were then stained with CellTracker Deep Red, a fluorescent dye that freely passes through cell membranes and is well-retained in cells, allowing labeling of cytoplasmic area and tracking cell movements. BMDMs undergoing efferocytosis of unlabeled apoptotic Jurkat cells were imaged with a Nikon Ti Eclipse inverted microscope for spinning-disk confocal microscopy equipped with a 100x/1.49 Apo TIRF oil immersion lens. Time-lapse images of the same fields were acquired at 30 s intervals for 20 min, and the movie was prepared and annotated using FIJI v2.3.0. As pointed out by the white arrow, the phagocytic cup formation is visualized by emerged F-actin signals, followed by engulfment of the apoptotic cell initially surrounded by F-actin. The complete engulfment is synchronized by reduced F-actin signals, indicating depolymerization.

### **Supplementary Movie 2: Z-stack imaging of engulfed beads surrounded by F-actin rings.**

Z-stack imaging was performed in order to visualize and determine if engulfed beads by macrophages were surrounded by F-actin rings. This reconstructed video serves as an example of F-actin ring-surrounded beads. Macrophages were stained with CellMask Deep Red Actin Tracking Stain and incubated with 10  $\mu\text{m}$  blue fluorescent (Ex365/Em415) polystyrene beads for 15 min and then fixed. Z-stack imaging was performed using a Nikon Ti Eclipse inverted microscope for spinning-disk confocal microscopy equipped with a 100x/1.49 Apo TIRF oil immersion lens. Images in a z-series through the cells were acquired at 0.5  $\mu\text{m}$  intervals and reconstructed into a video that visualizes F-actin ring-surrounded beads at different focal planes as denoted by the white arrows. FIJI v2.3.0 was used to process and annotate the movie.
